# Supplementary material for: A simple and efficient method for the facile access of highly functionalized pyridines and their fluorescence property studies
Source: Royal Society of Chemistry journal article supplement (doi:10.1039/c2ra21385k), 2012-01-01

## Supporting Information for:

### **A simple and efficient method for the facile access of highly functionalized pyridines and their fluorescence property studies**

*Md. Nasim Khan<sup>a</sup>, Suman Pal,<sup>a</sup> Tasneem Parvin<sup>b</sup> and Lokman H. Choudhury\*<sup>a</sup>*

*<sup>a</sup>Department of Chemistry, Indian Institute of Technology Patna, Bihar 800 013, India*

Corresponding author's E-mail: [lokman@iitp.ac.in](mailto:lokman@iitp.ac.in)

*<sup>b</sup>Department of Chemistry, National Institute of Technology Patna, Bihar 800 005, India*

### **Table of Content**

|                                                                                                                                                                                    |        |
|------------------------------------------------------------------------------------------------------------------------------------------------------------------------------------|--------|
| Fluorescence quantum yield of pyridine derivatives ( <b>1b-1p</b> , <b>5b</b> & <b>5c</b> ) in chloroform solvent and equation used for the fluorescence quantum yield calculation | S2     |
| <sup>1</sup> H and <sup>13</sup> C NMR spectra of <b>1a-1p</b> , <b>2a-2c</b> , <b>5a-5d</b> , <b>3a</b> , <b>3b</b> , <b>4</b> & <b>6</b>                                         | S3-S29 |

## Fluorescence quantum yield of pyridine derivatives (1b-1p, 5b & 5c) in chloroform solvent:

| Sr. No | Compound  | $\lambda_{\text{max}}^{\text{abs}}$ | $\lambda_{\text{max}}^{\text{em}}$ | $\Phi_f$ |
|--------|-----------|-------------------------------------|------------------------------------|----------|
| 01.    | <b>1b</b> | 343                                 | 432                                | 0.03     |
| 02.    | <b>1c</b> | 346                                 | 386                                | 0.05     |
| 03.    | <b>1d</b> | 343                                 | 386                                | 0.04     |
| 04.    | <b>1e</b> | 348                                 | 389                                | 0.02     |
| 05.    | <b>1f</b> | 344                                 | 425                                | 0.01     |
| 06.    | <b>1g</b> | 356                                 | 401                                | 0.00     |
| 07.    | <b>1h</b> | 345                                 | 392                                | 0.02     |
| 08.    | <b>1i</b> | 350                                 | 389                                | 0.00     |
| 09.    | <b>1j</b> | 346                                 | 425                                | 0.01     |
| 10.    | <b>1k</b> | 329                                 | 386                                | 0.01     |
| 11.    | <b>1l</b> | 336                                 | 386                                | 0.01     |
| 12.    | <b>1m</b> | 341                                 | 451                                | 0.03     |
| 13.    | <b>1n</b> | 343                                 | 422                                | 0.01     |
| 14.    | <b>1o</b> | 344                                 | 422                                | 0.01     |
| 15.    | <b>1p</b> | 347                                 | 423                                | 0.02     |
| 16.    | <b>5b</b> | 314                                 | 417                                | 0.10     |
| 17.    | <b>5c</b> | 346                                 | 424                                | 0.27     |

<sup>a</sup>Quantum yields were calculated with respect to quinine sulphate dihydrate in water.

$\Phi_f$  = Quantum yield

$\lambda_{\text{max}}^{\text{abs}}$  = Absorbance maxima

$\lambda_{\text{max}}^{\text{em}}$  = Fluorescence maxima

Fluorescence quantum yields ( $\Phi_f$ ) were calculated according to the equation.

$$\Phi_{\text{unk}} = \Phi_{\text{std}} \times [I_{\text{unk}} / I_{\text{std}}] \times [A_{\text{std}} / A_{\text{unk}}] \times [\eta_{\text{unk}} / \eta_{\text{std}}]^2$$

Where,  $\Phi_{\text{unk}}$  is the fluorescence quantum yield of the sample,  $\Phi_{\text{std}}$  is the quantum yield of the standard ( $\Phi_f = 0.55$ , quinine sulphate dihydrate in 0.1 N H<sub>2</sub>SO<sub>4</sub>),  $I_{\text{unk}}$  and  $I_{\text{std}}$  are the integrated emission intensities of the sample and the standard, respectively,  $A_{\text{unk}}$  and  $A_{\text{std}}$  are the absorbance of the sample and the standard at the excitation wavelength, respectively, and  $\eta_{\text{unk}}$  and  $\eta_{\text{std}}$  are the refractive index of the medium taken.

### $^1\text{H}$ and $^{13}\text{C}$ spectra of compound **1a**

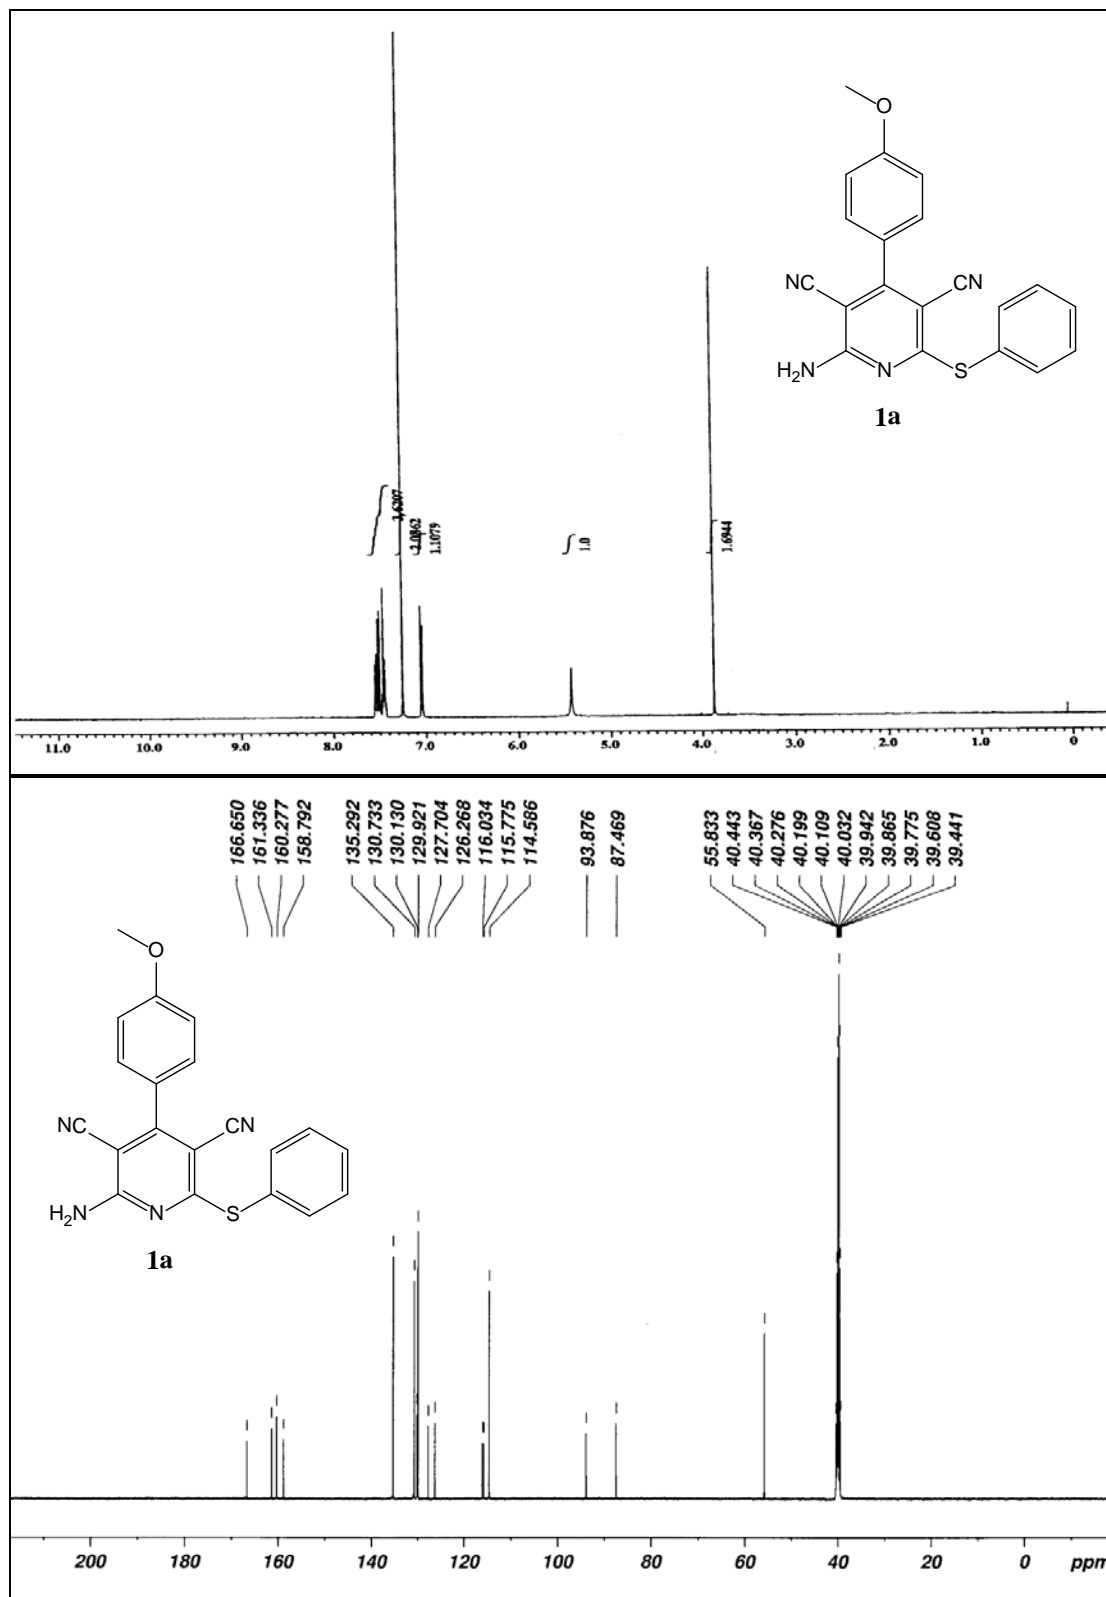

### $^1\text{H}$ and $^{13}\text{C}$ spectra of compound **1b**

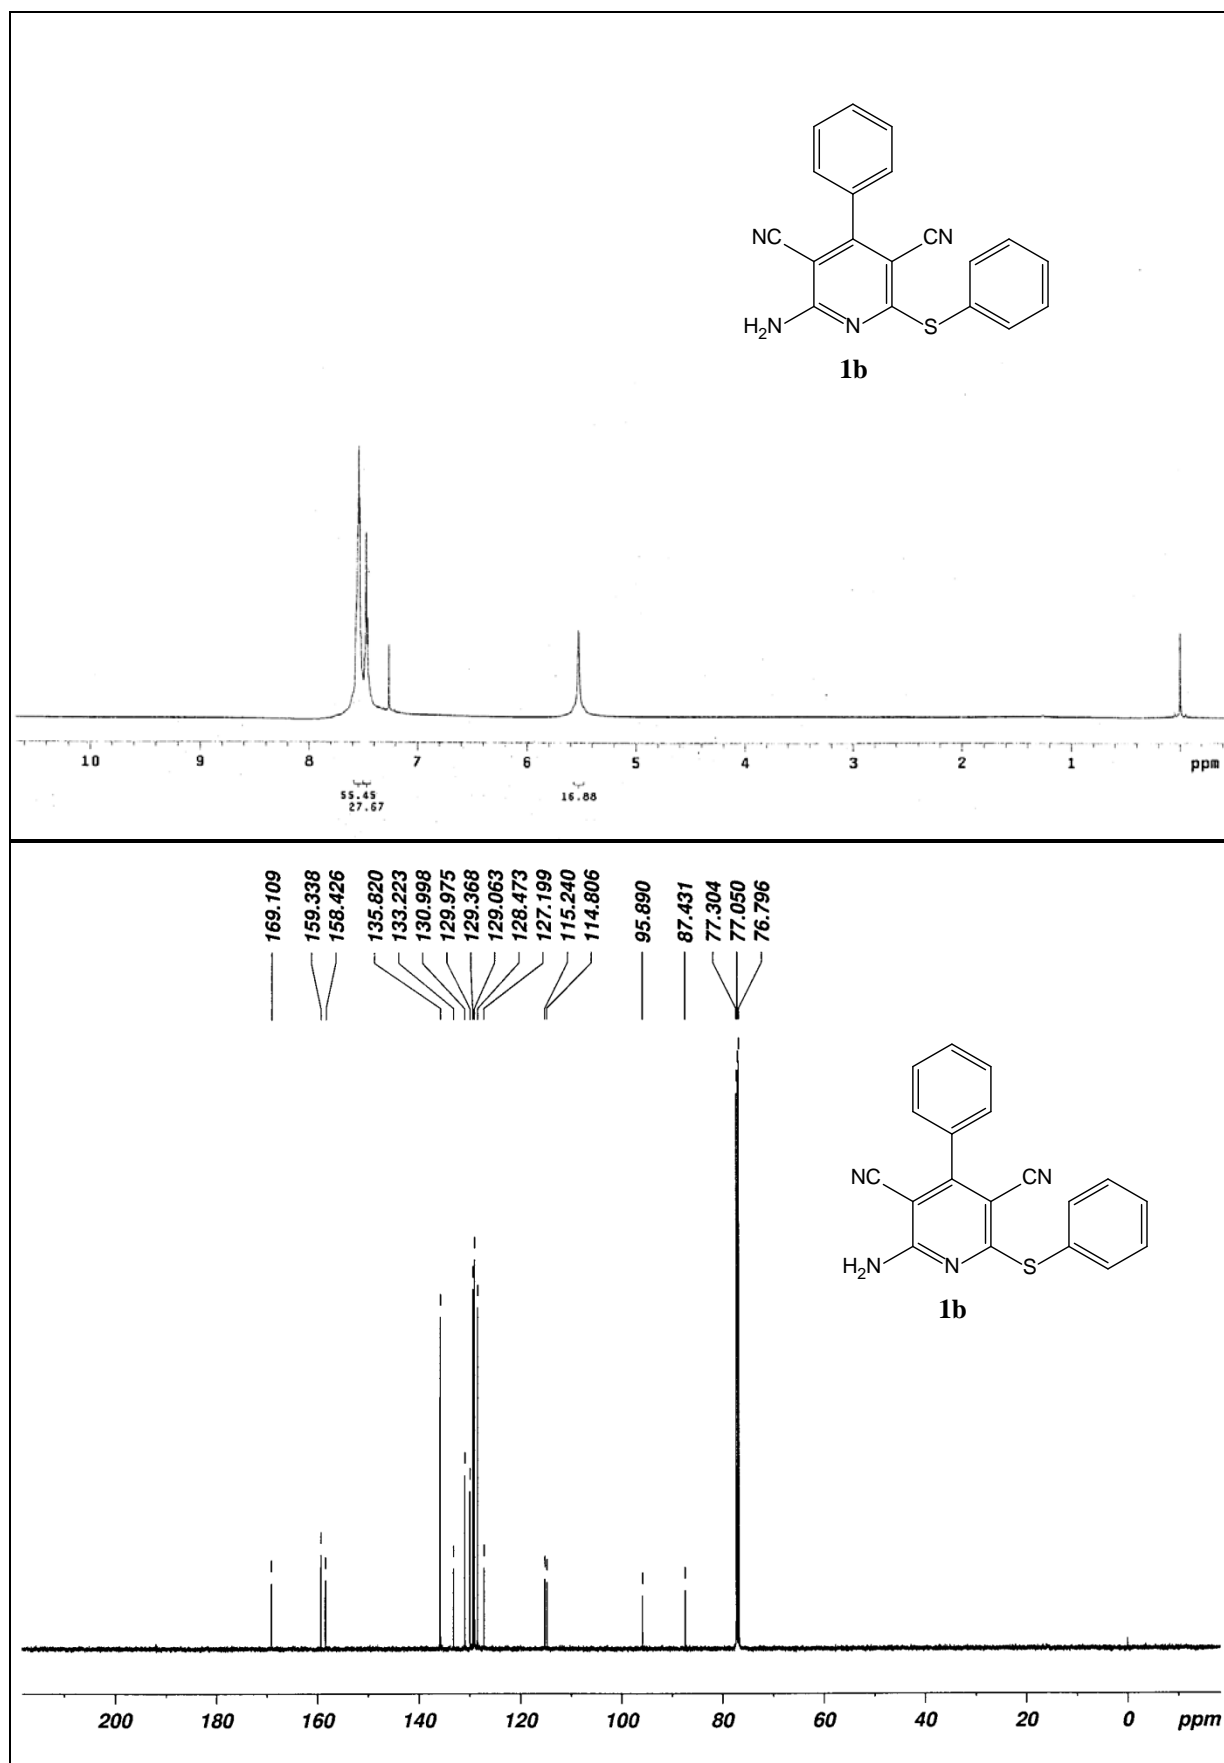

### $^1\text{H}$ and $^{13}\text{C}$ spectra of compound **1c**

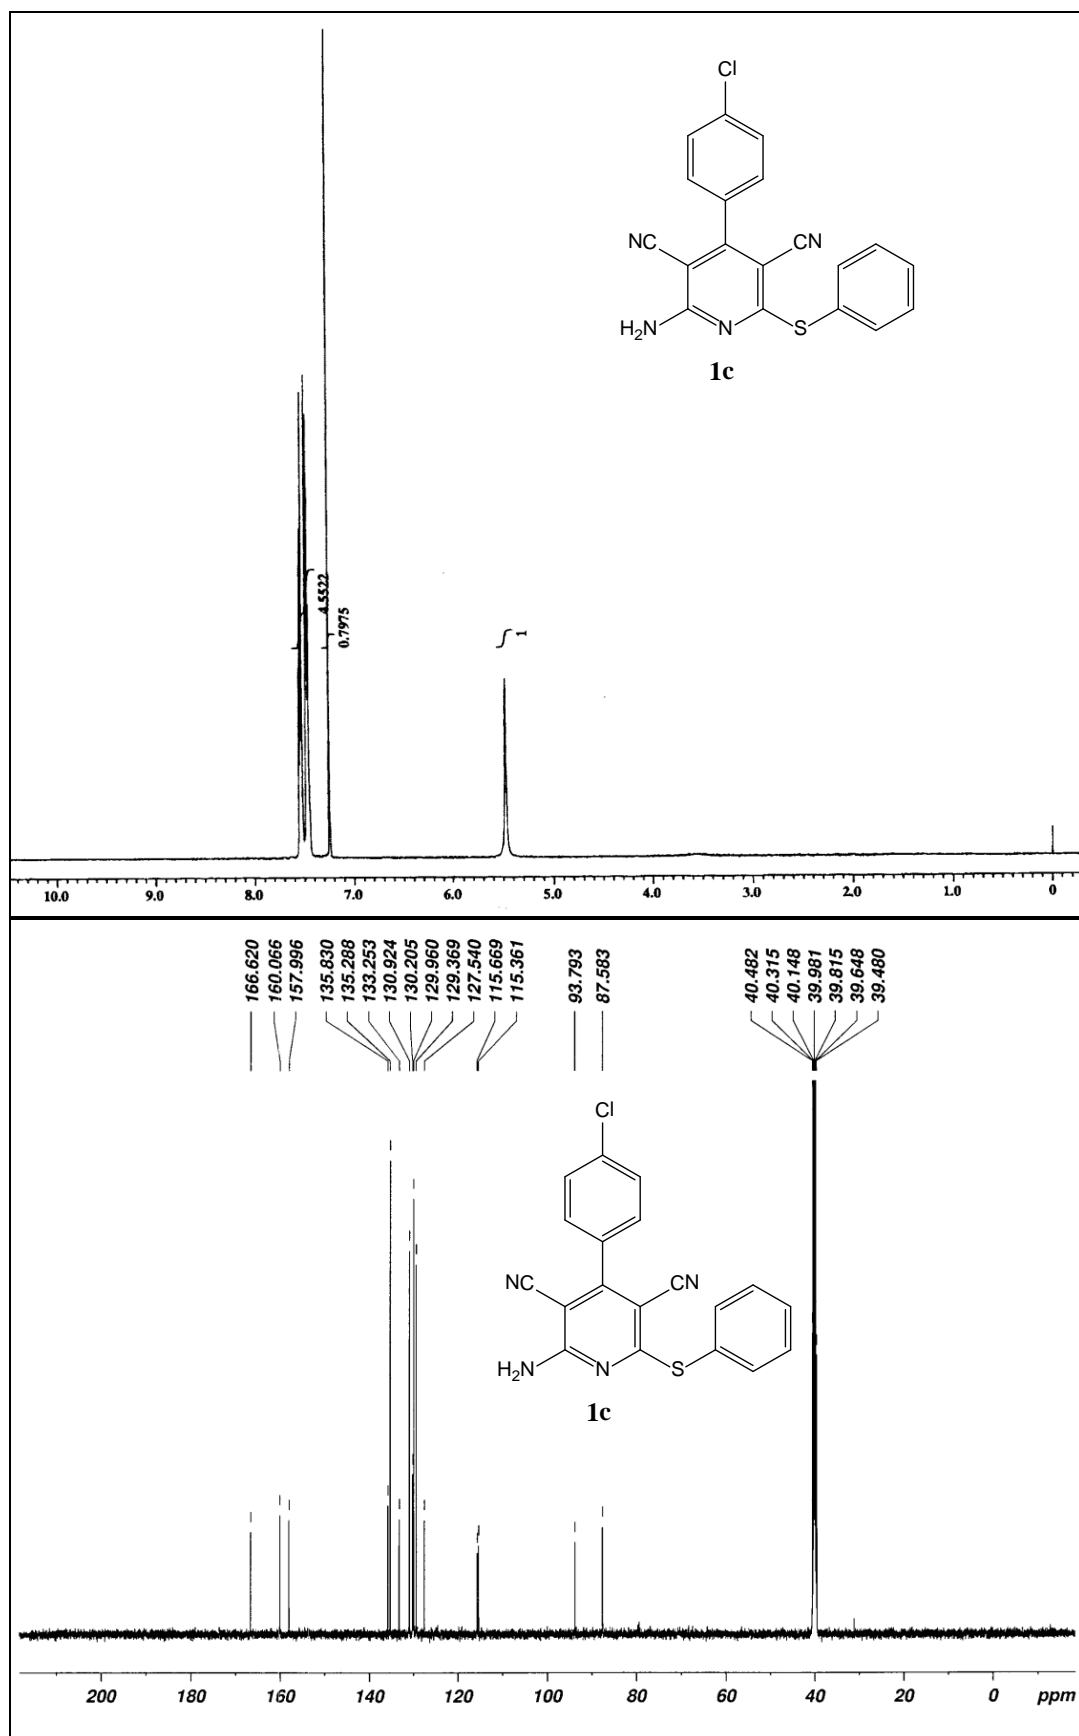

### $^1\text{H}$ and $^{13}\text{C}$ spectra of compound **1d**

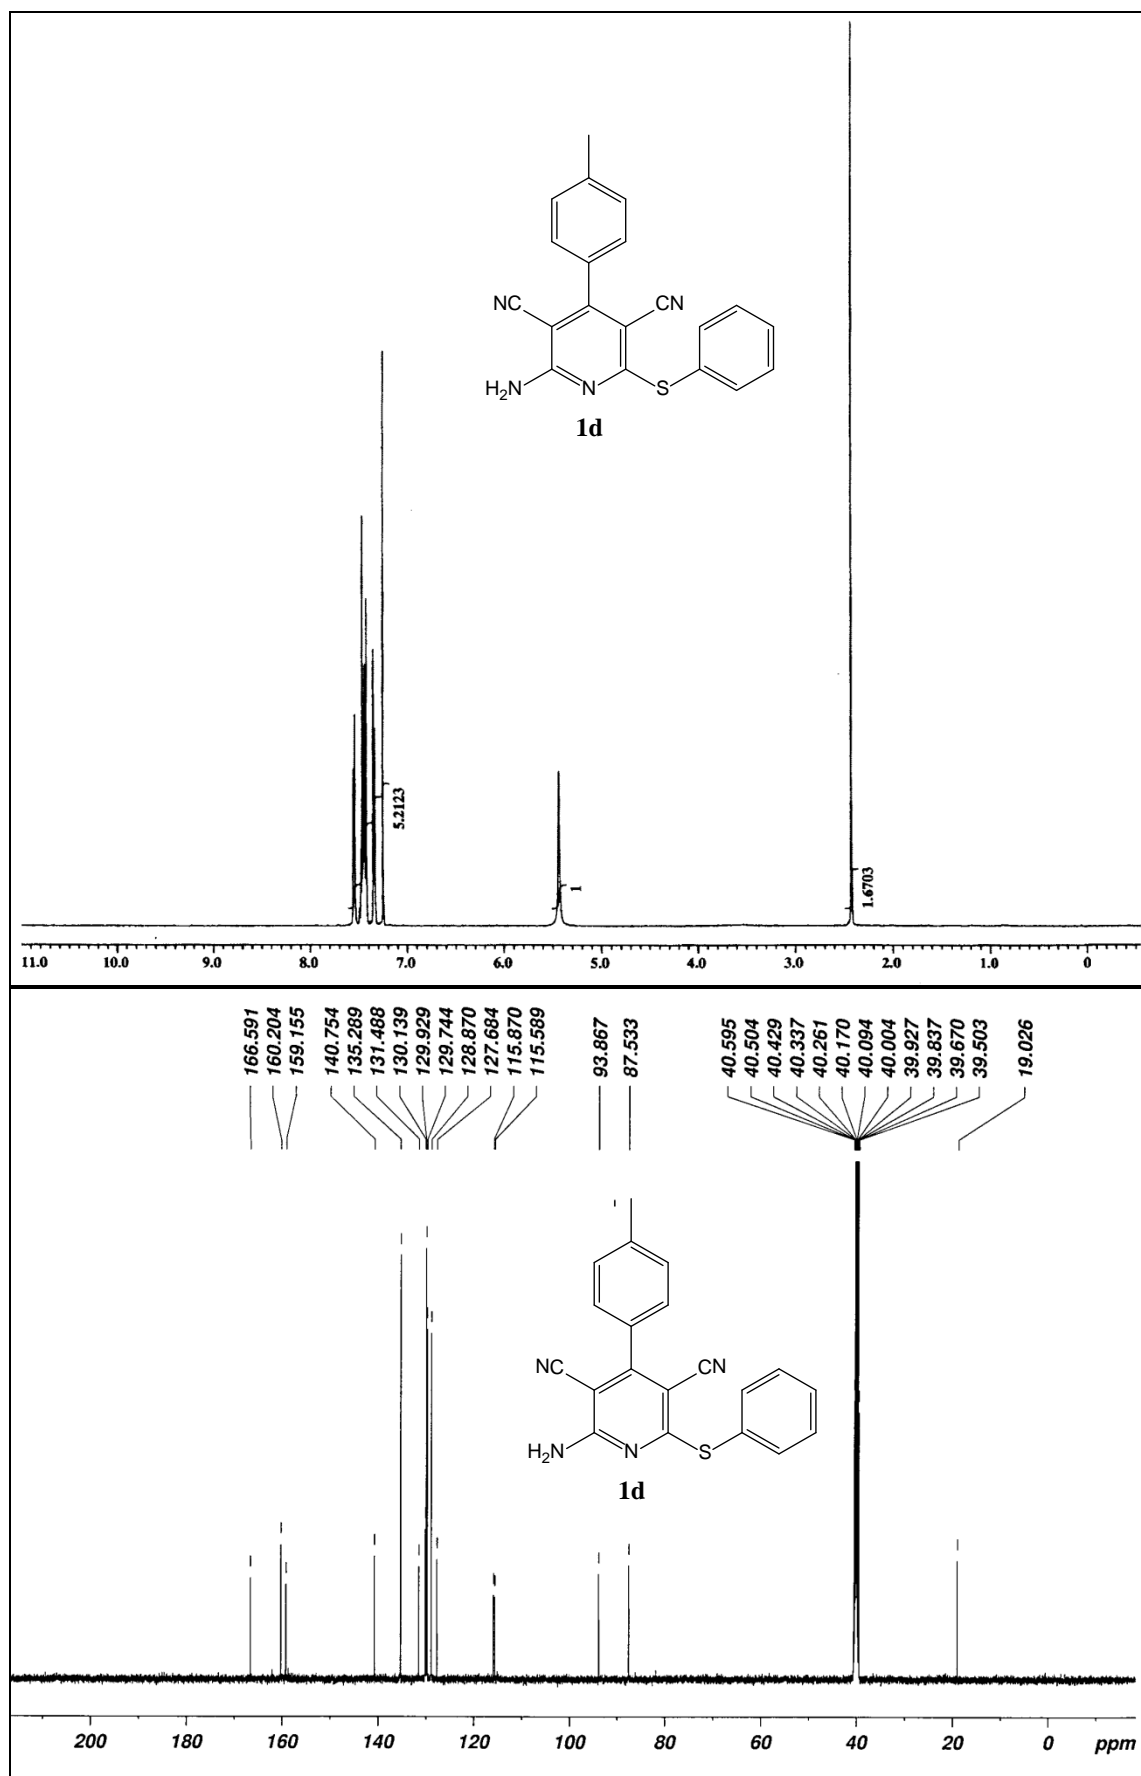

### $^1\text{H}$ and $^{13}\text{C}$ spectra of compound **1e**

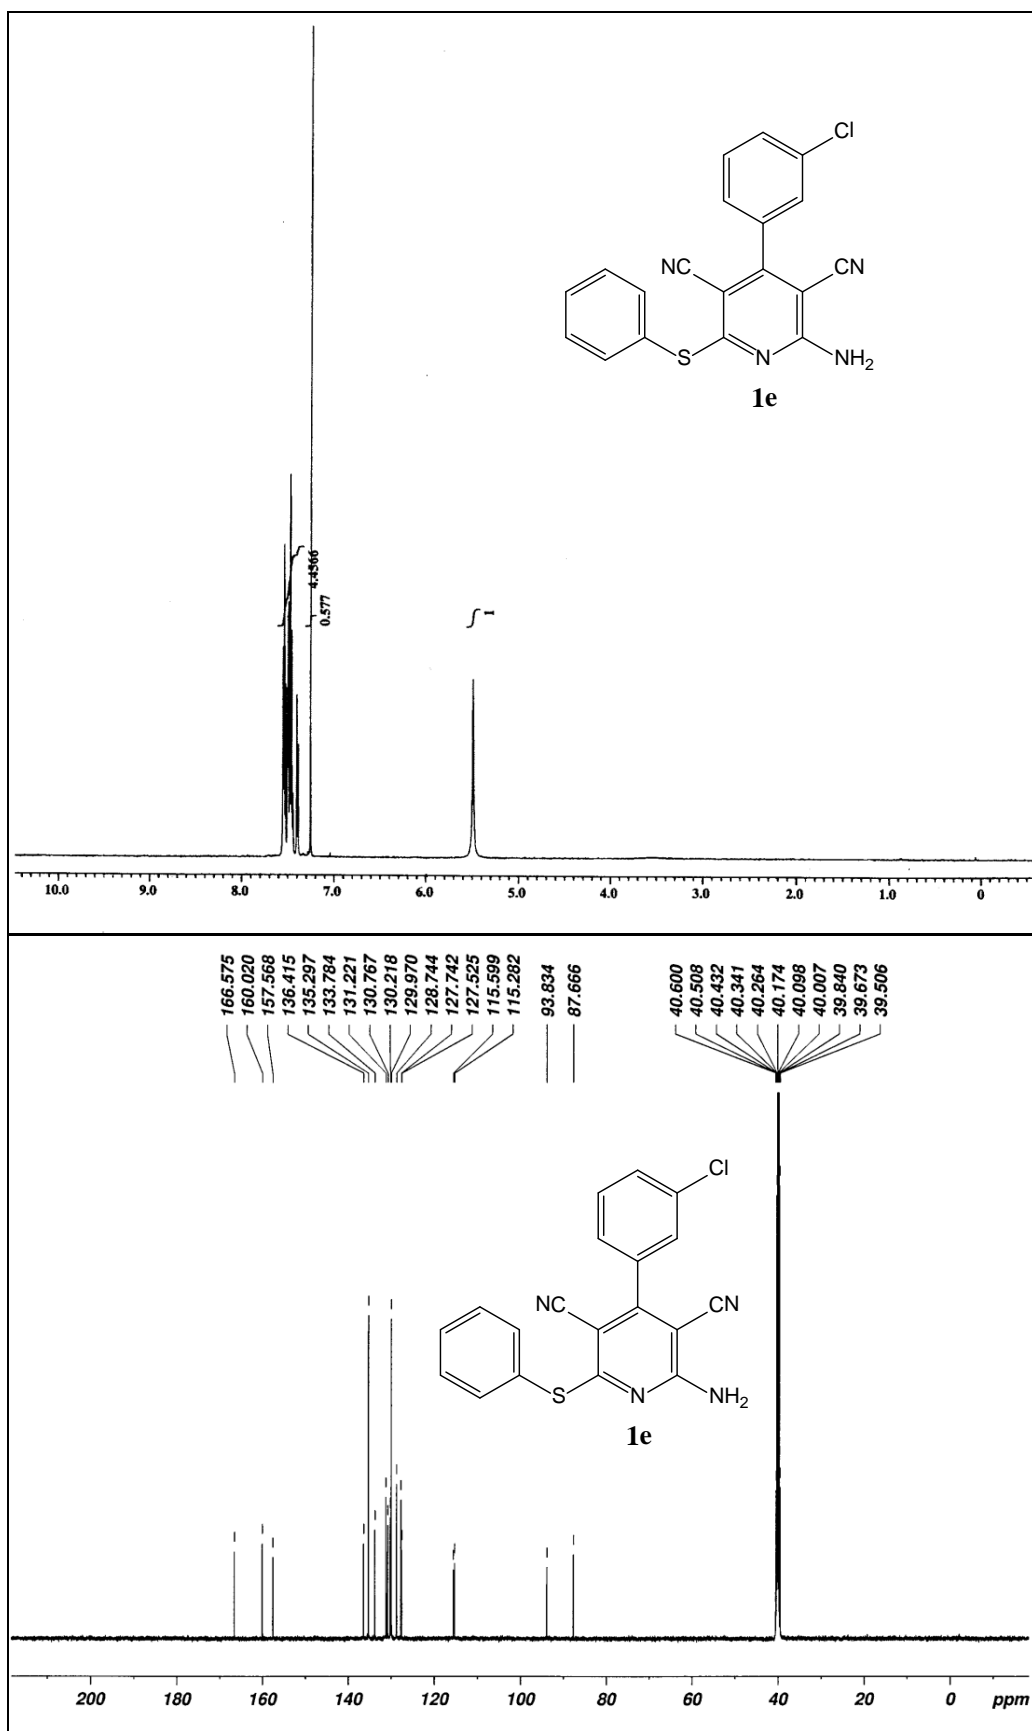

### $^1\text{H}$ and $^{13}\text{C}$ spectra of compound **1f**

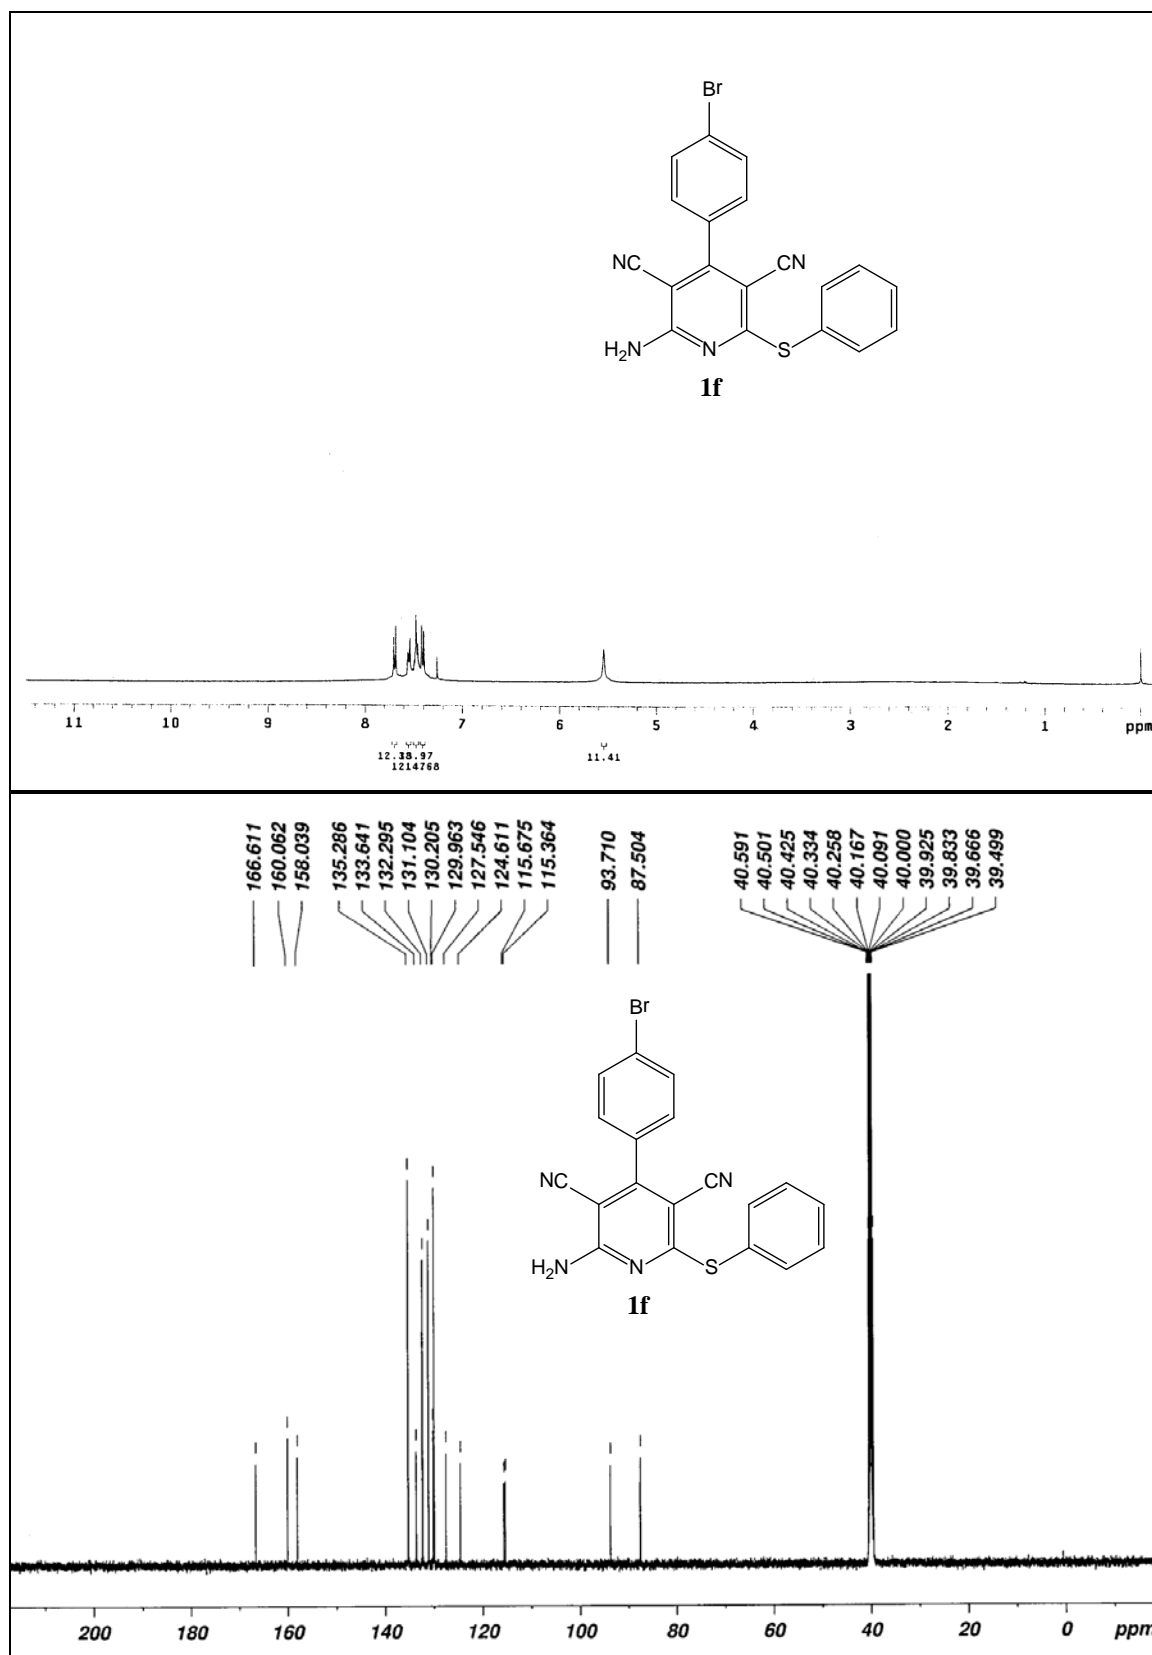



# $^1\text{H}$ and $^{13}\text{C}$ spectra of compound **1g**

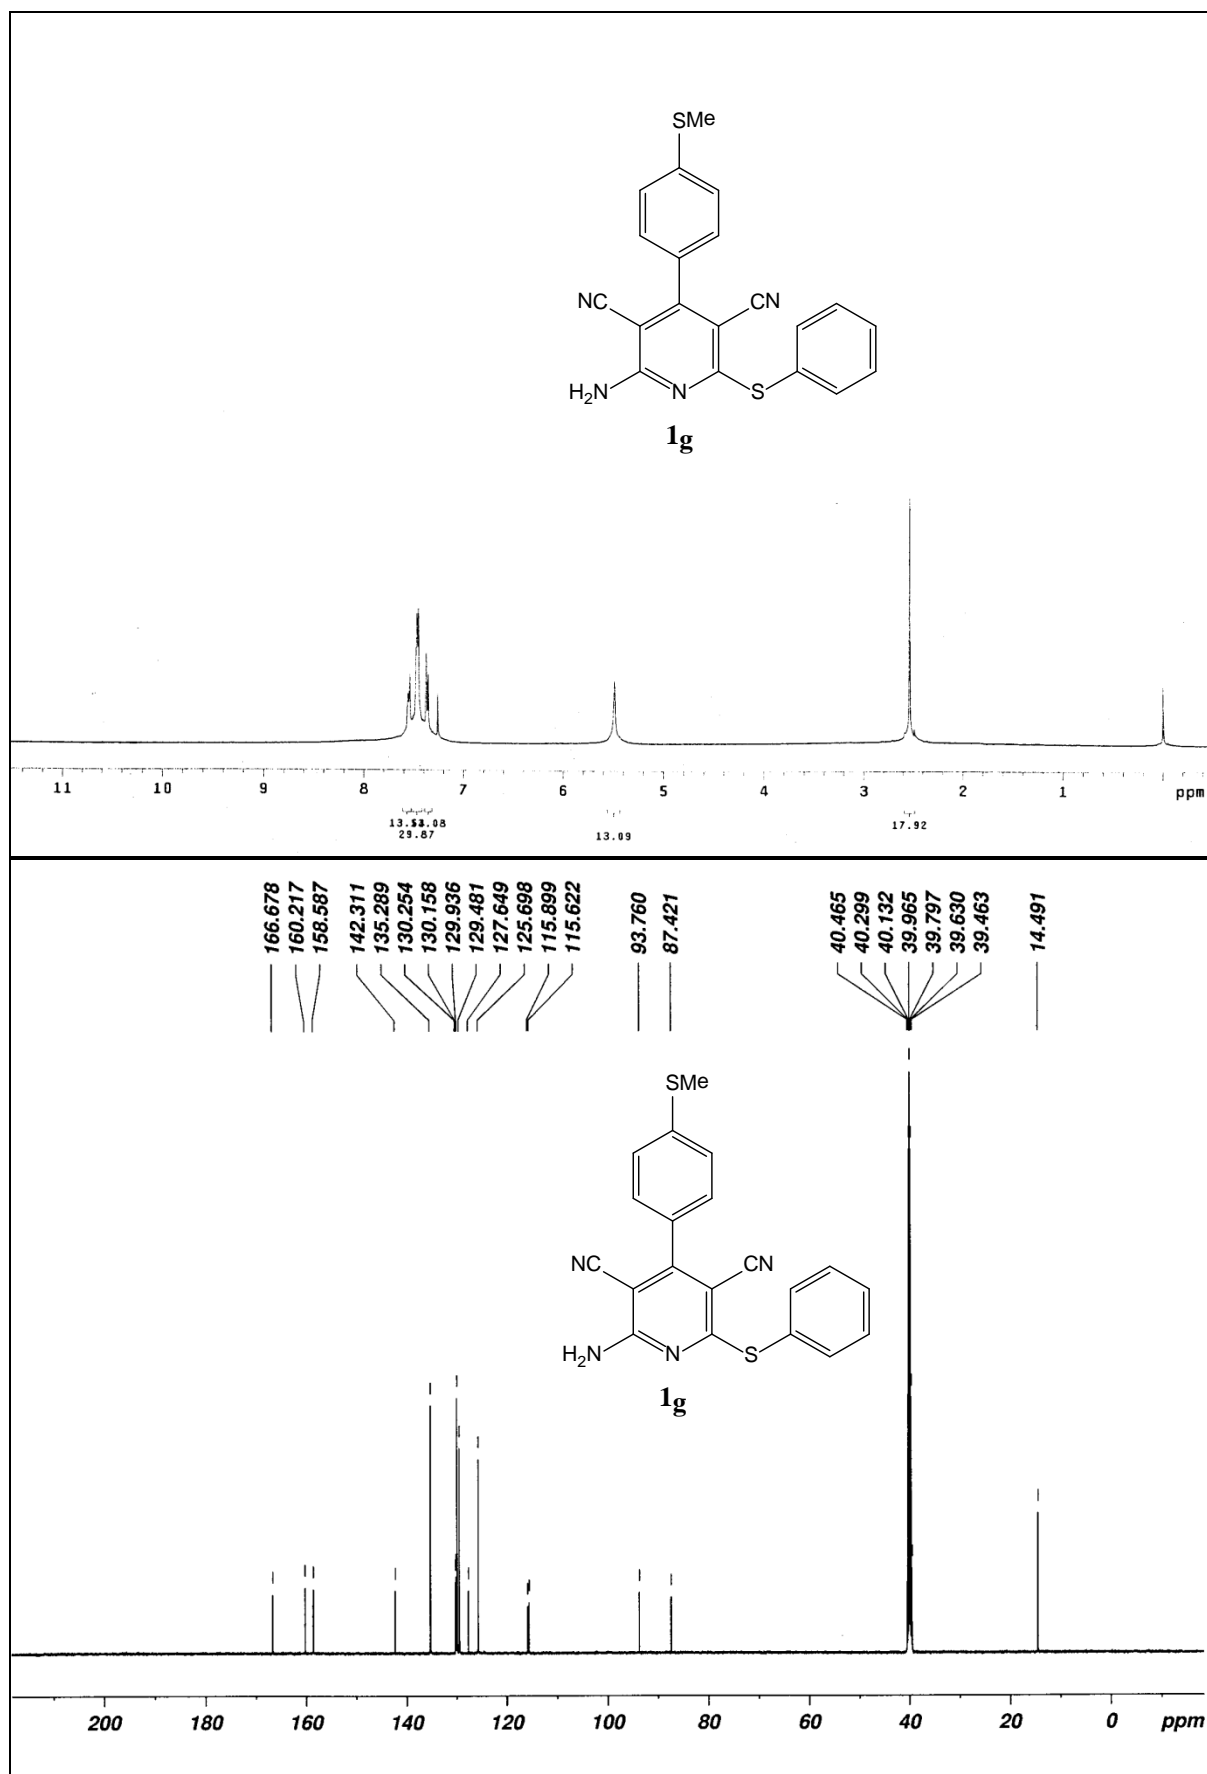

### $^1\text{H}$ and $^{13}\text{C}$ spectra of compound **1h**

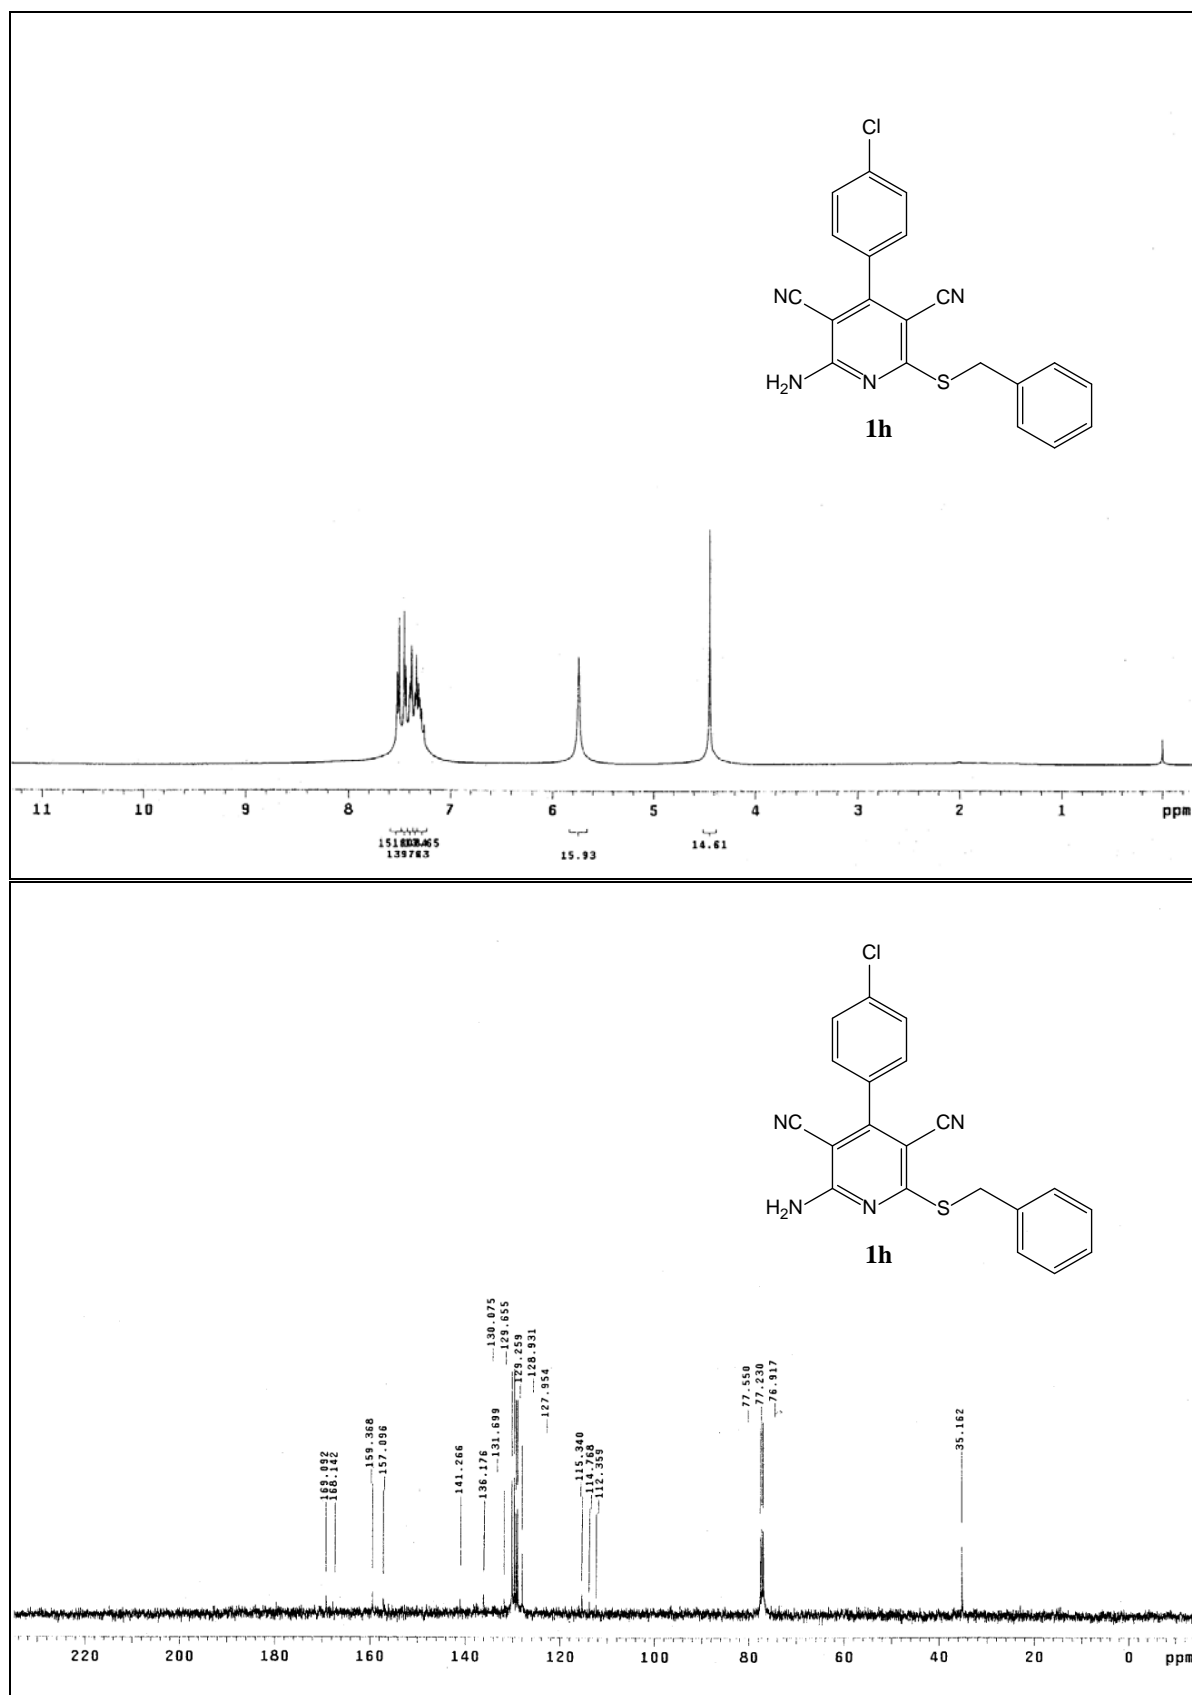

### $^1\text{H}$ and $^{13}\text{C}$ spectra of compound **1i**

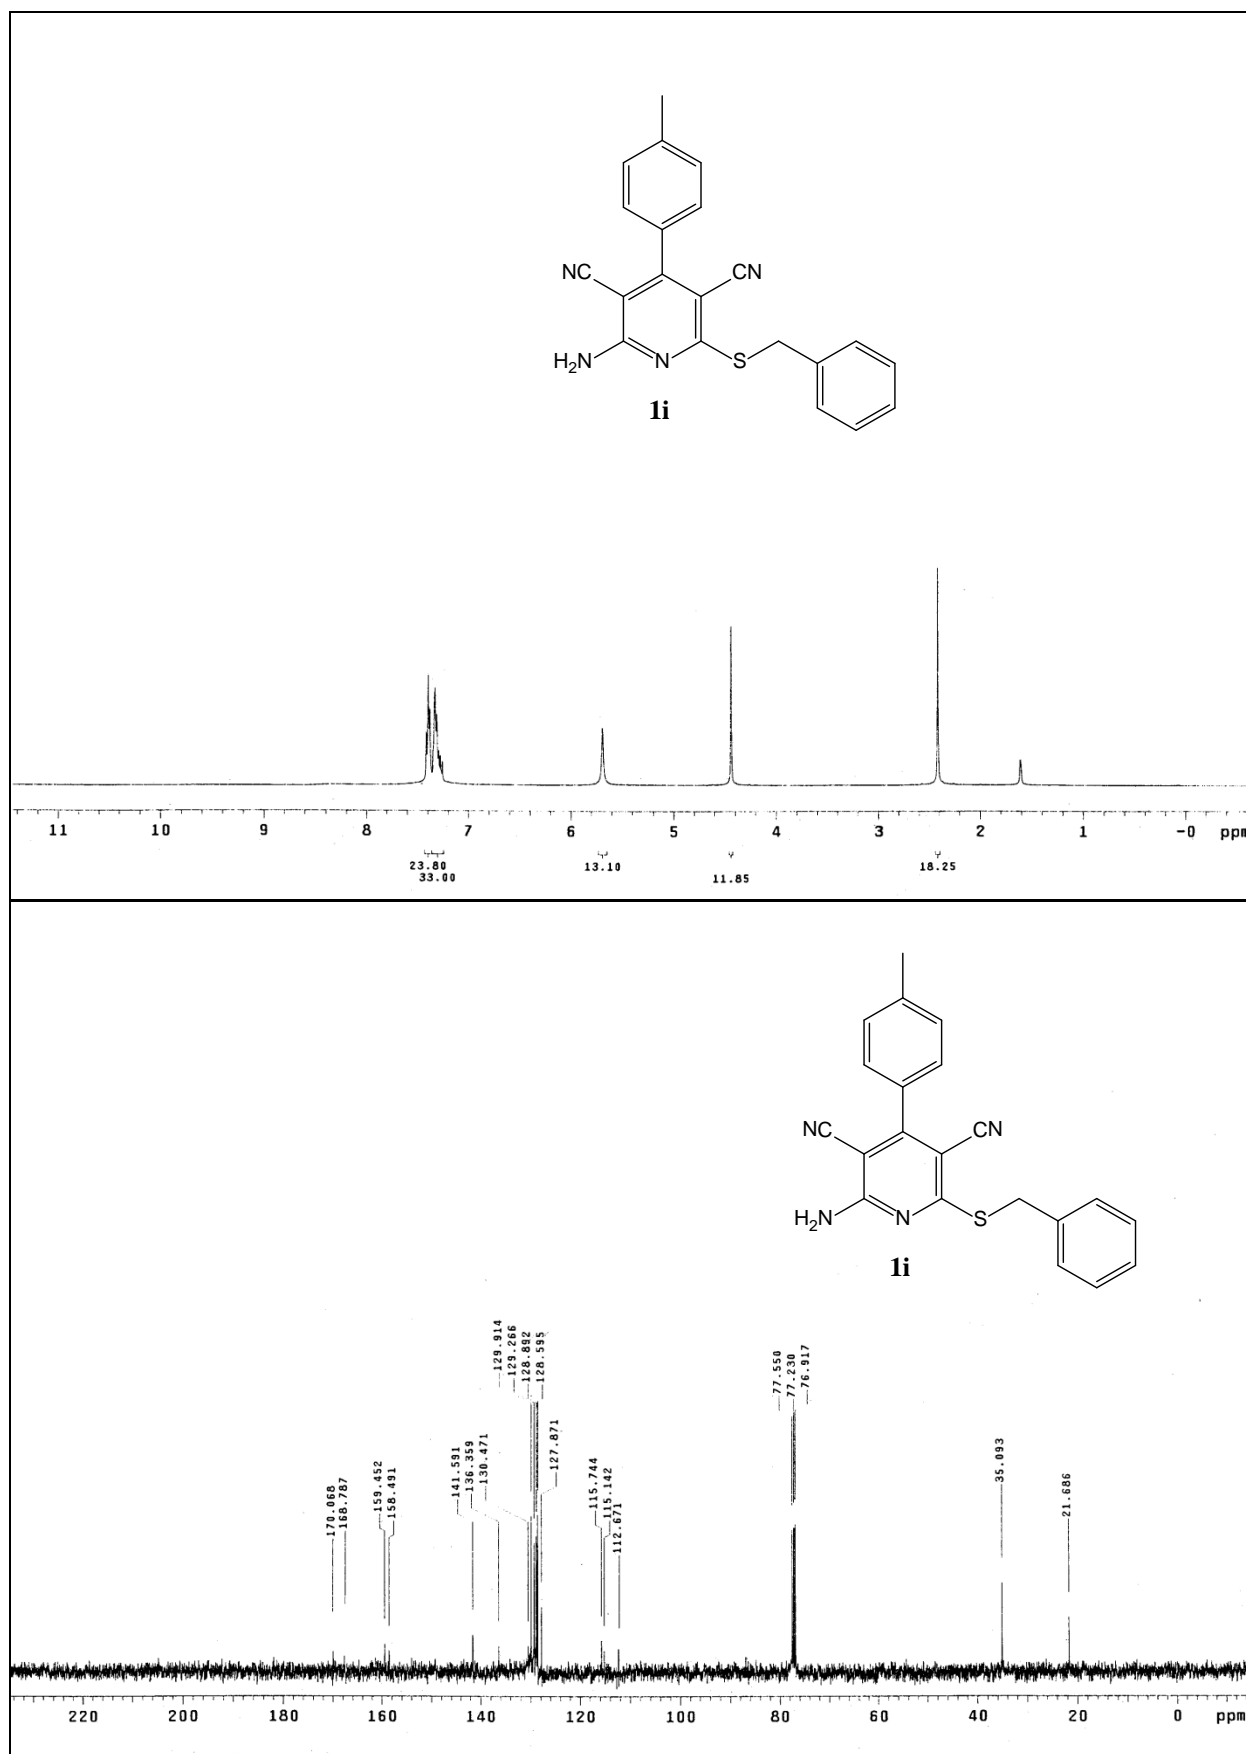

### $^1\text{H}$ and $^{13}\text{C}$ spectra of compound **1j**

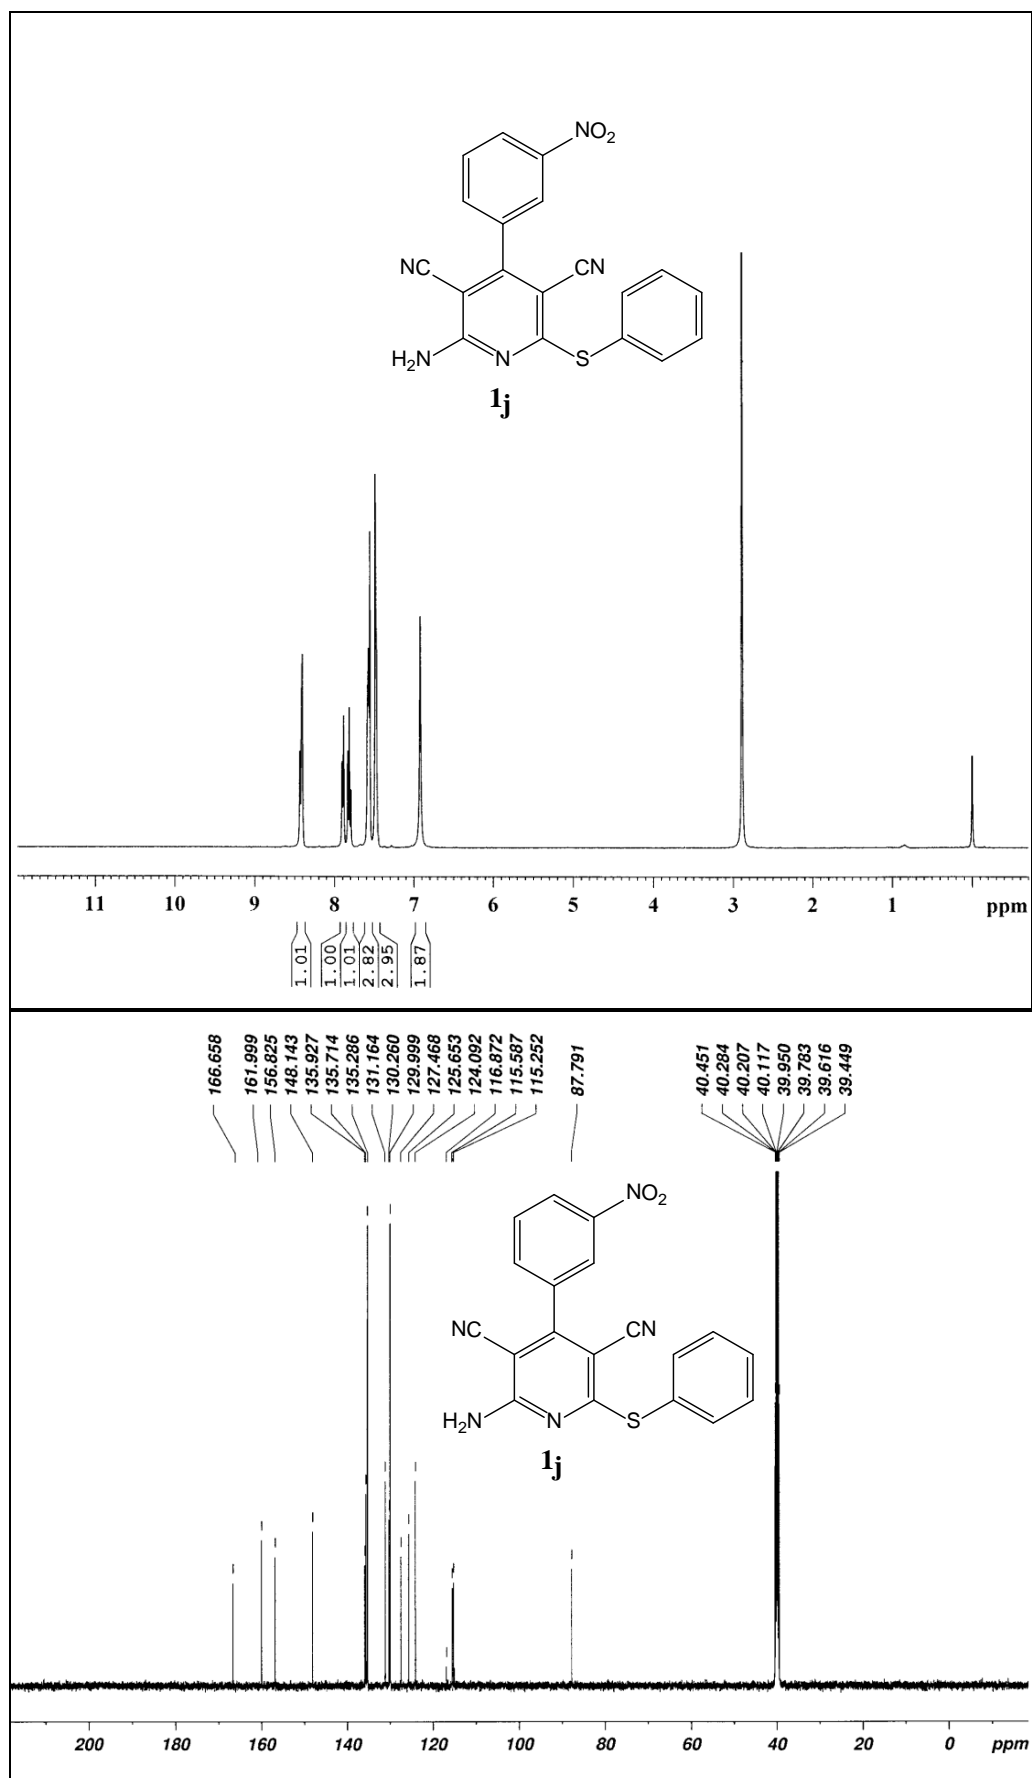

### $^1\text{H}$ and $^{13}\text{C}$ spectra of compound **1k**

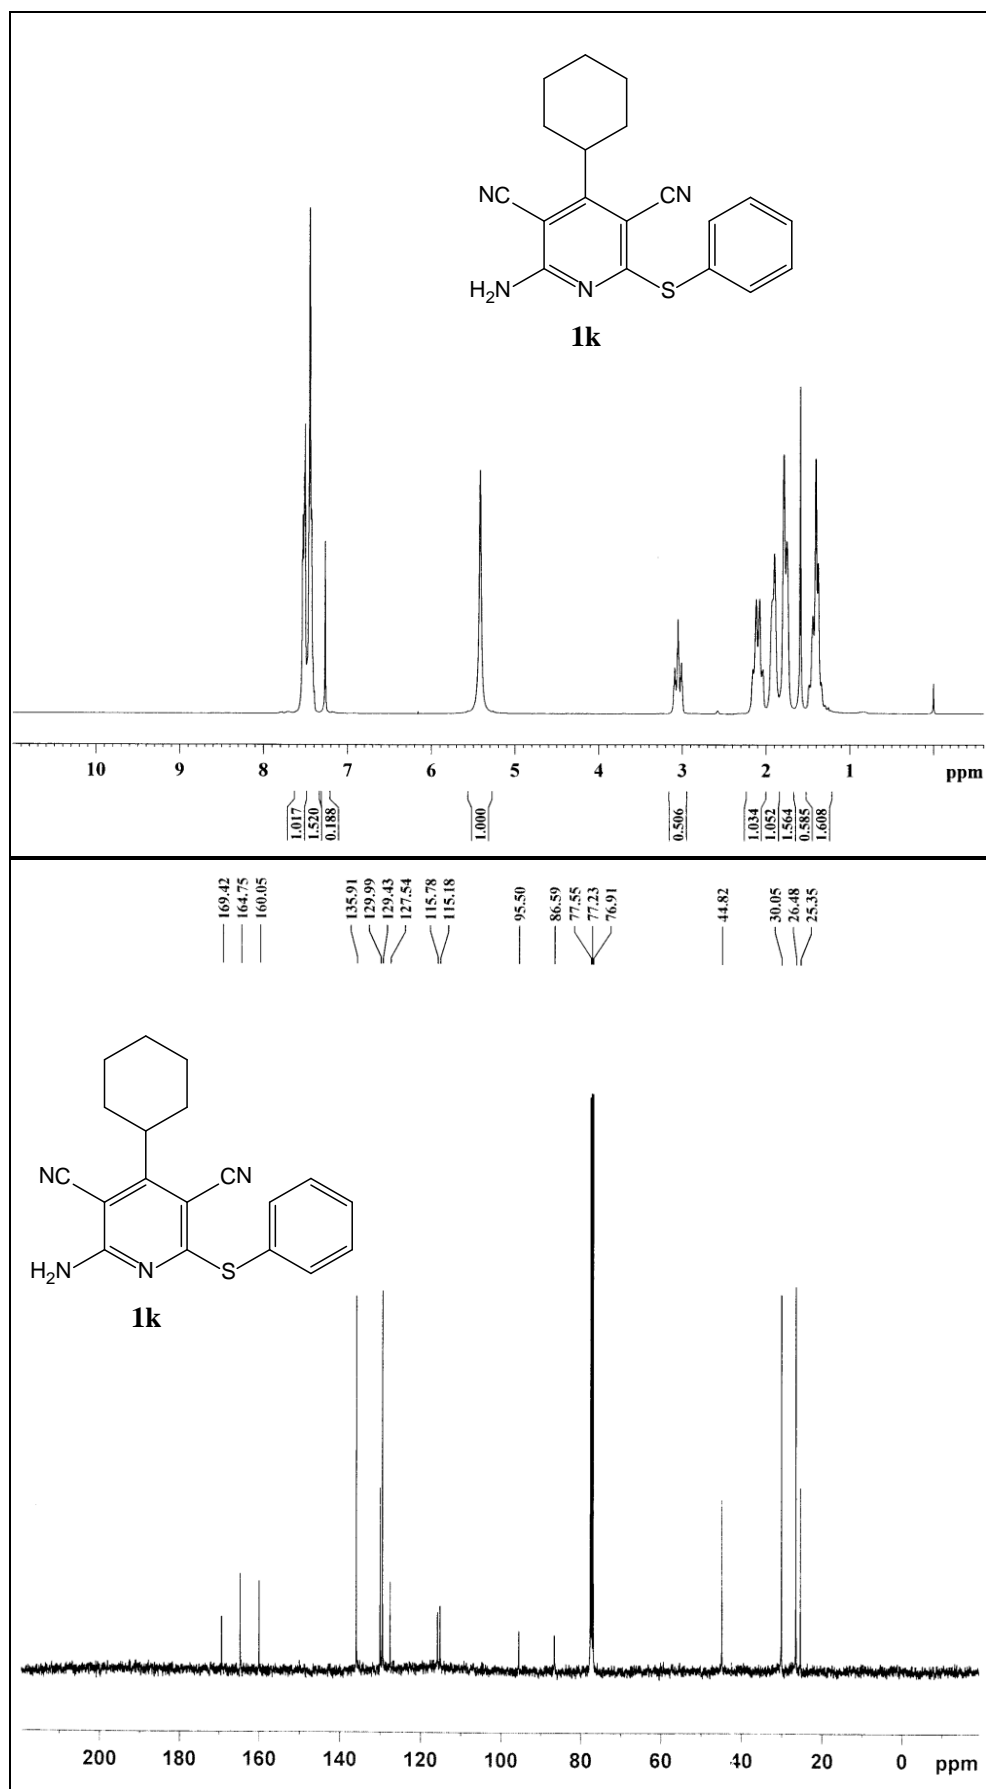

### $^1\text{H}$ and $^{13}\text{C}$ spectra of compound **11**

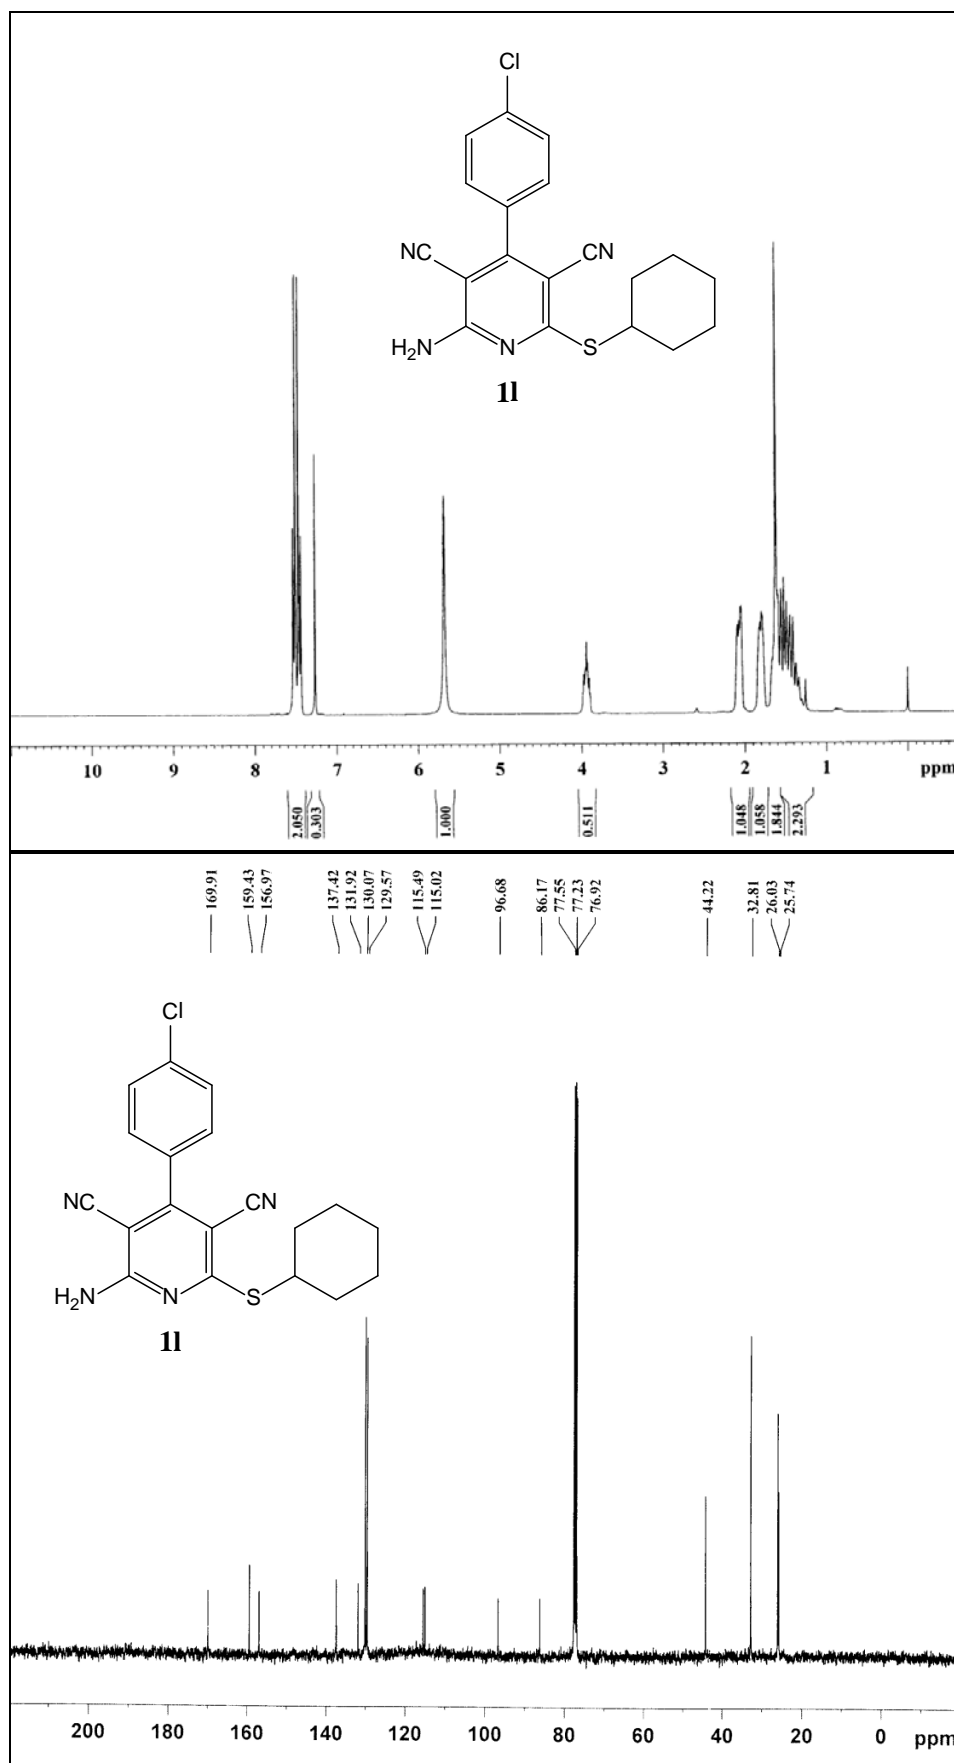

### $^1\text{H}$ and $^{13}\text{C}$ spectra of compound **1m**

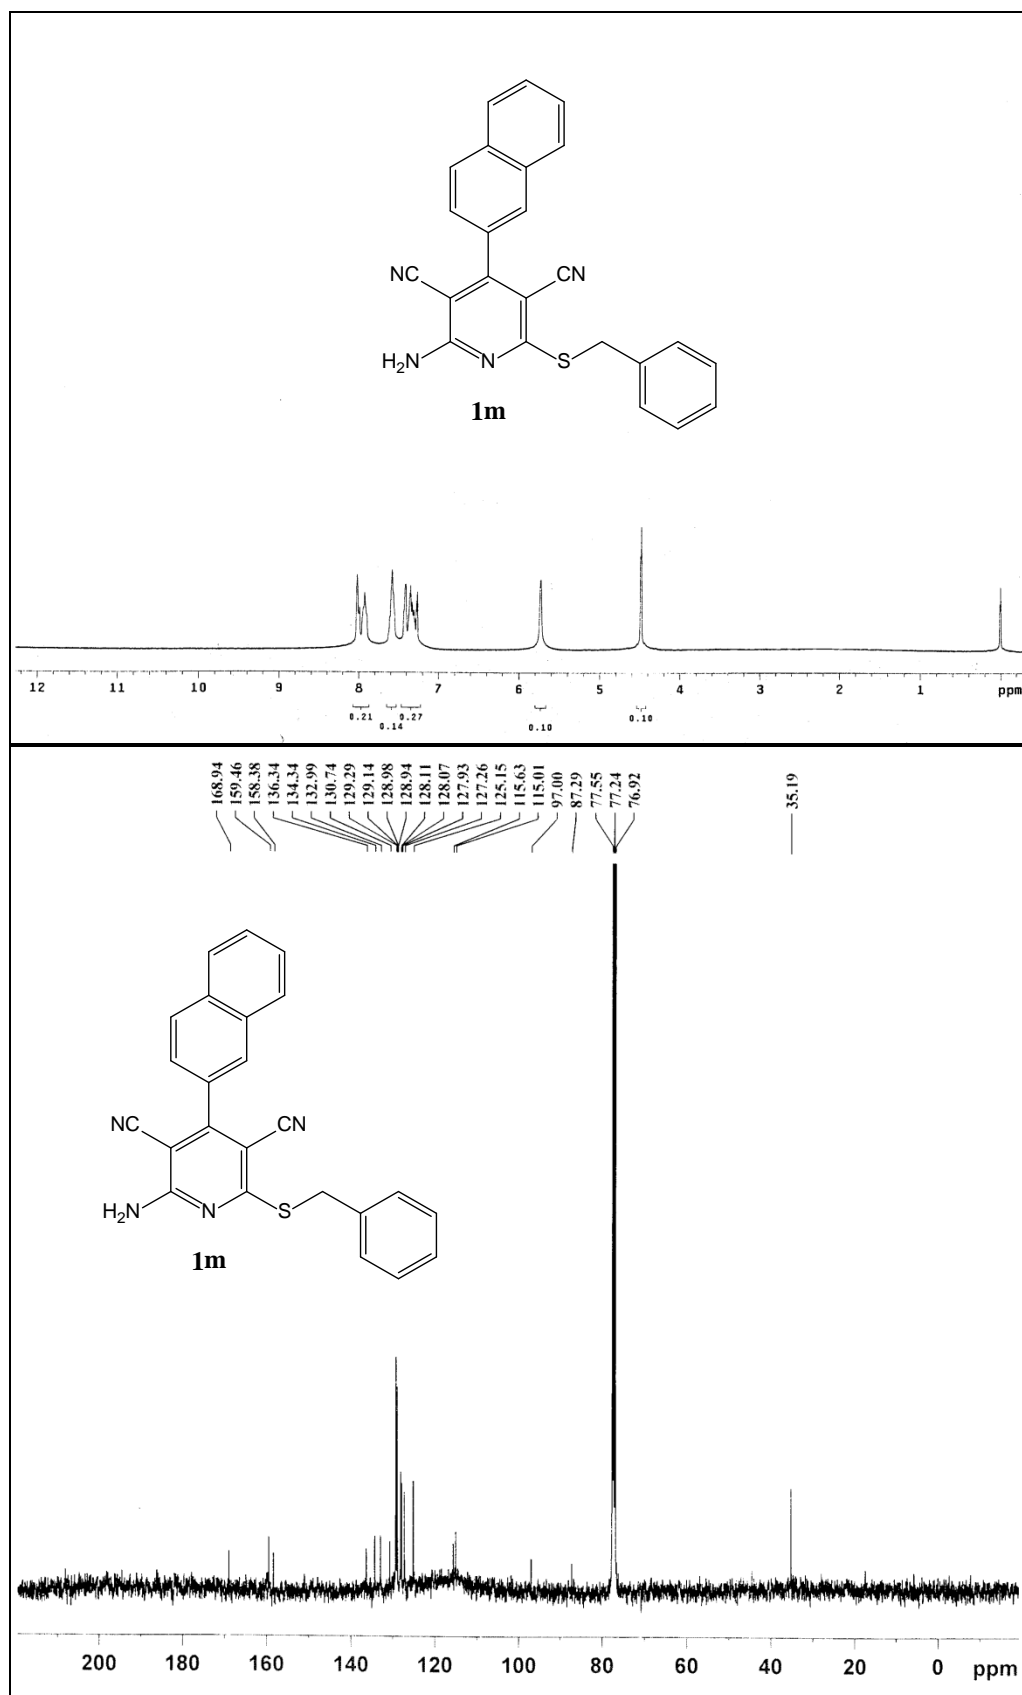

### $^1\text{H}$ and $^{13}\text{C}$ spectra of compound **1n**

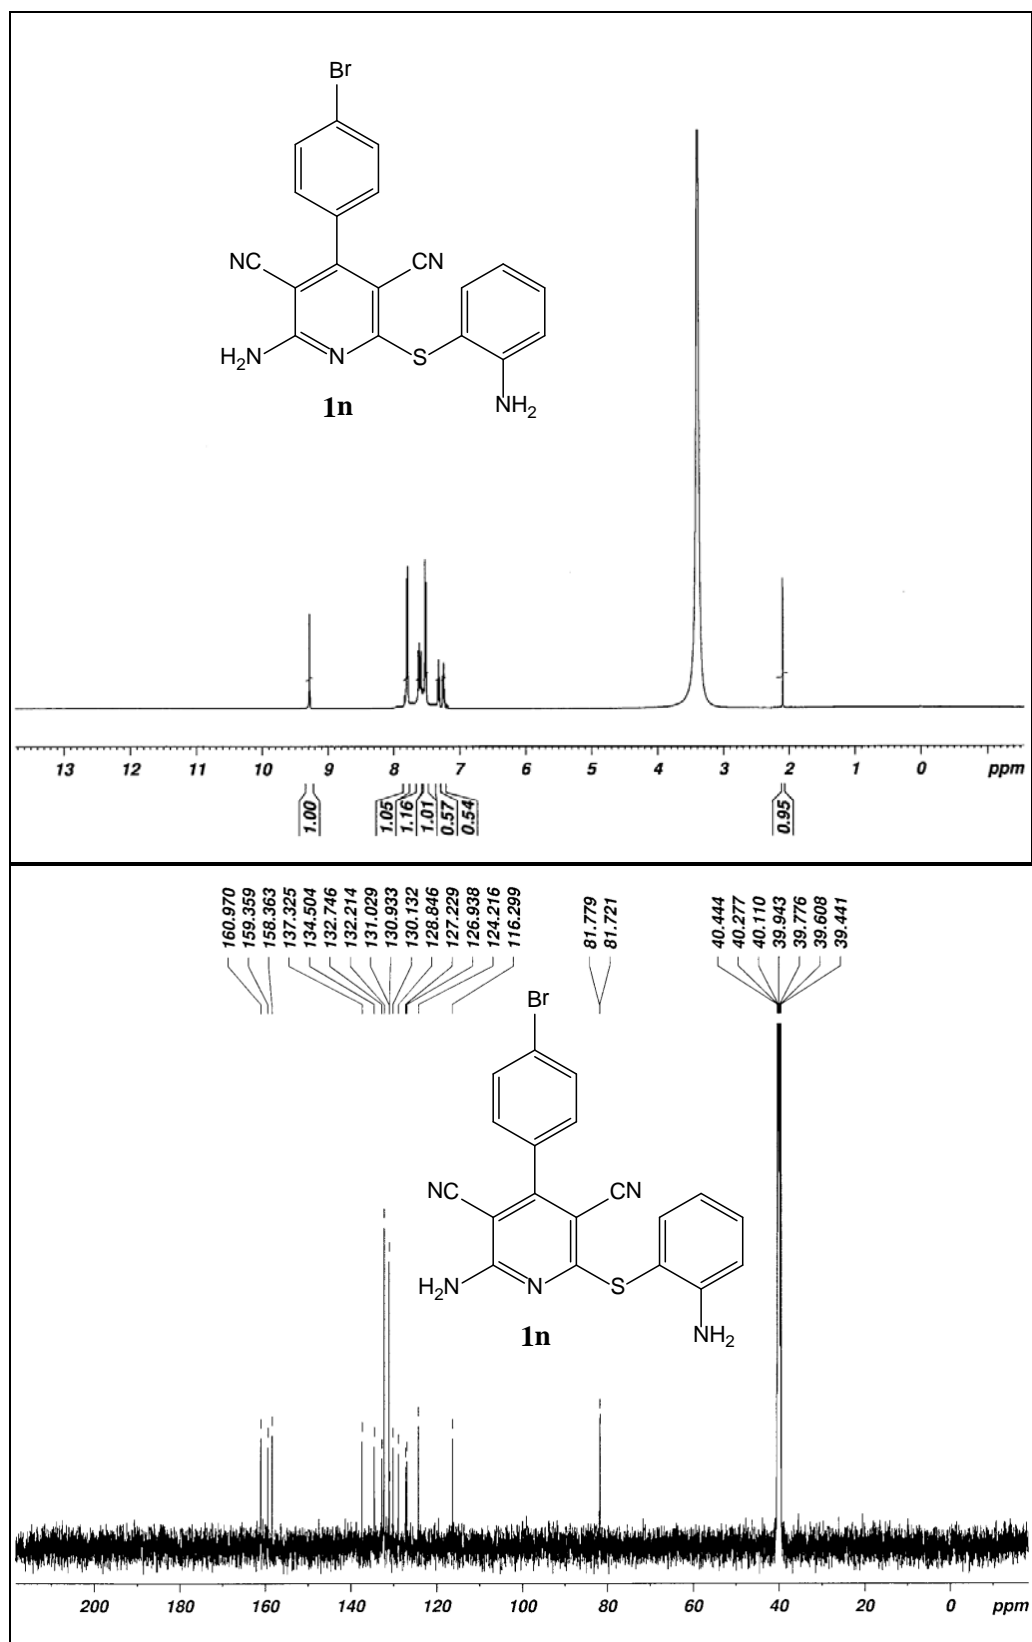



### $^1\text{H}$ and $^{13}\text{C}$ spectra of compound **1o**

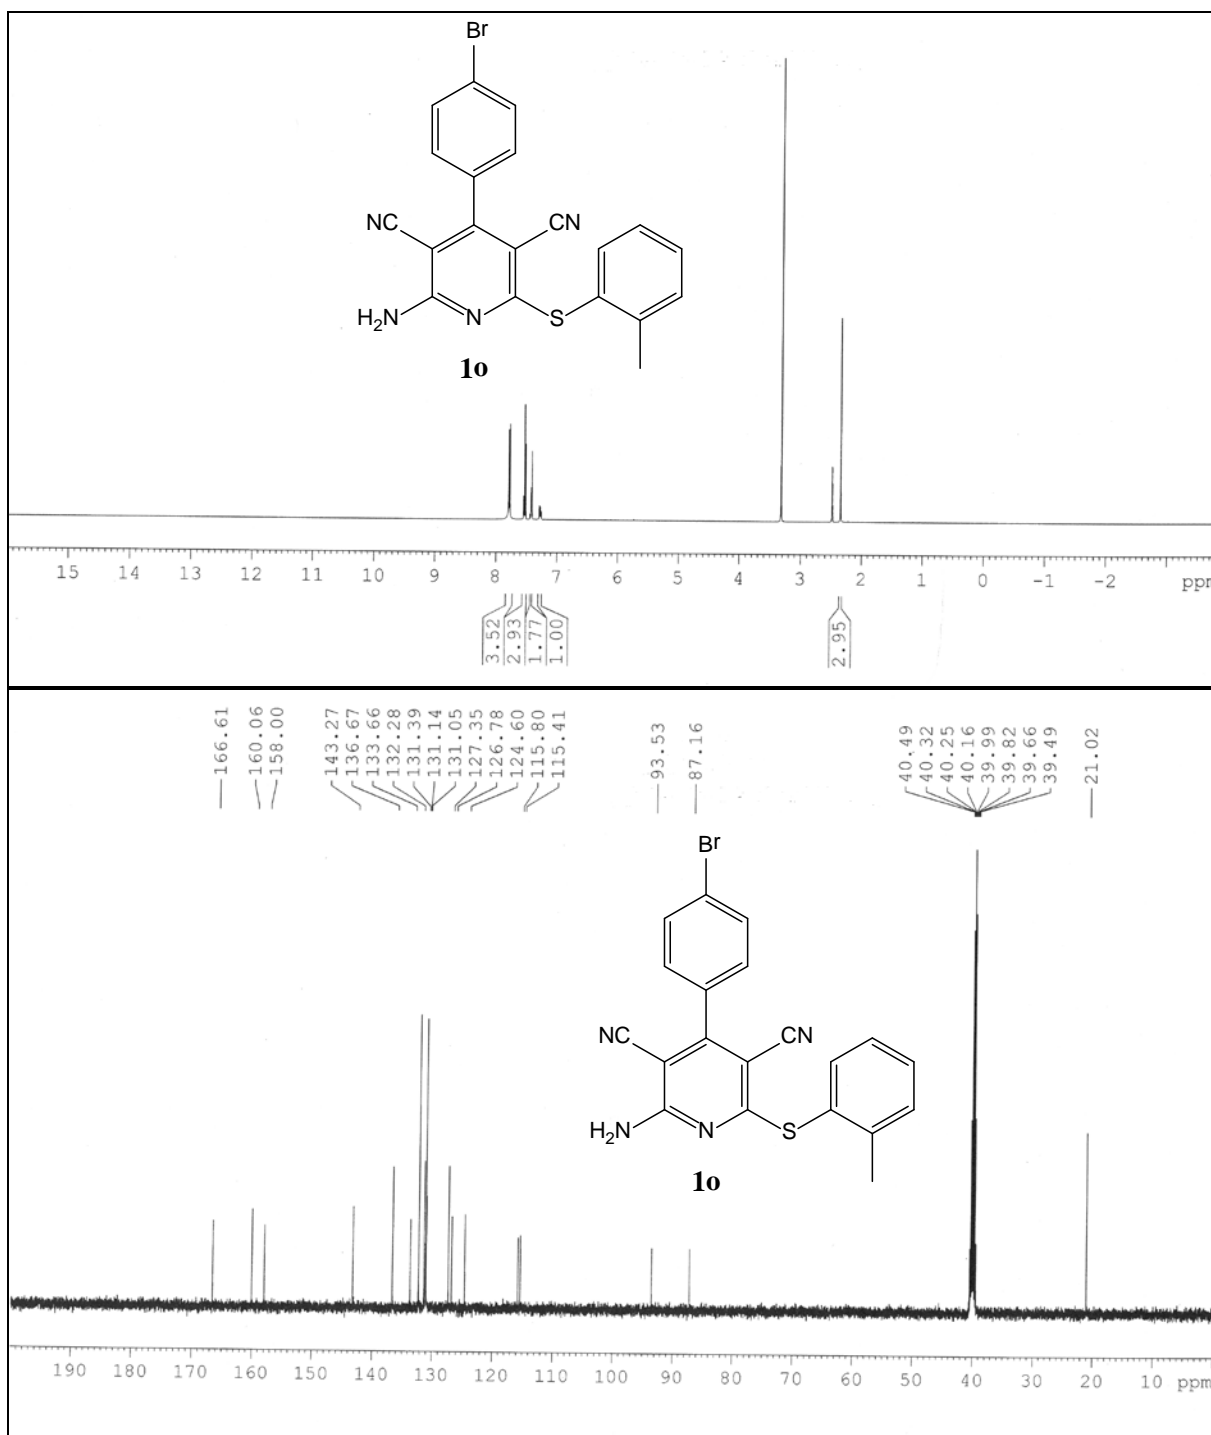

### $^1\text{H}$ and $^{13}\text{C}$ spectra of compound **1p**

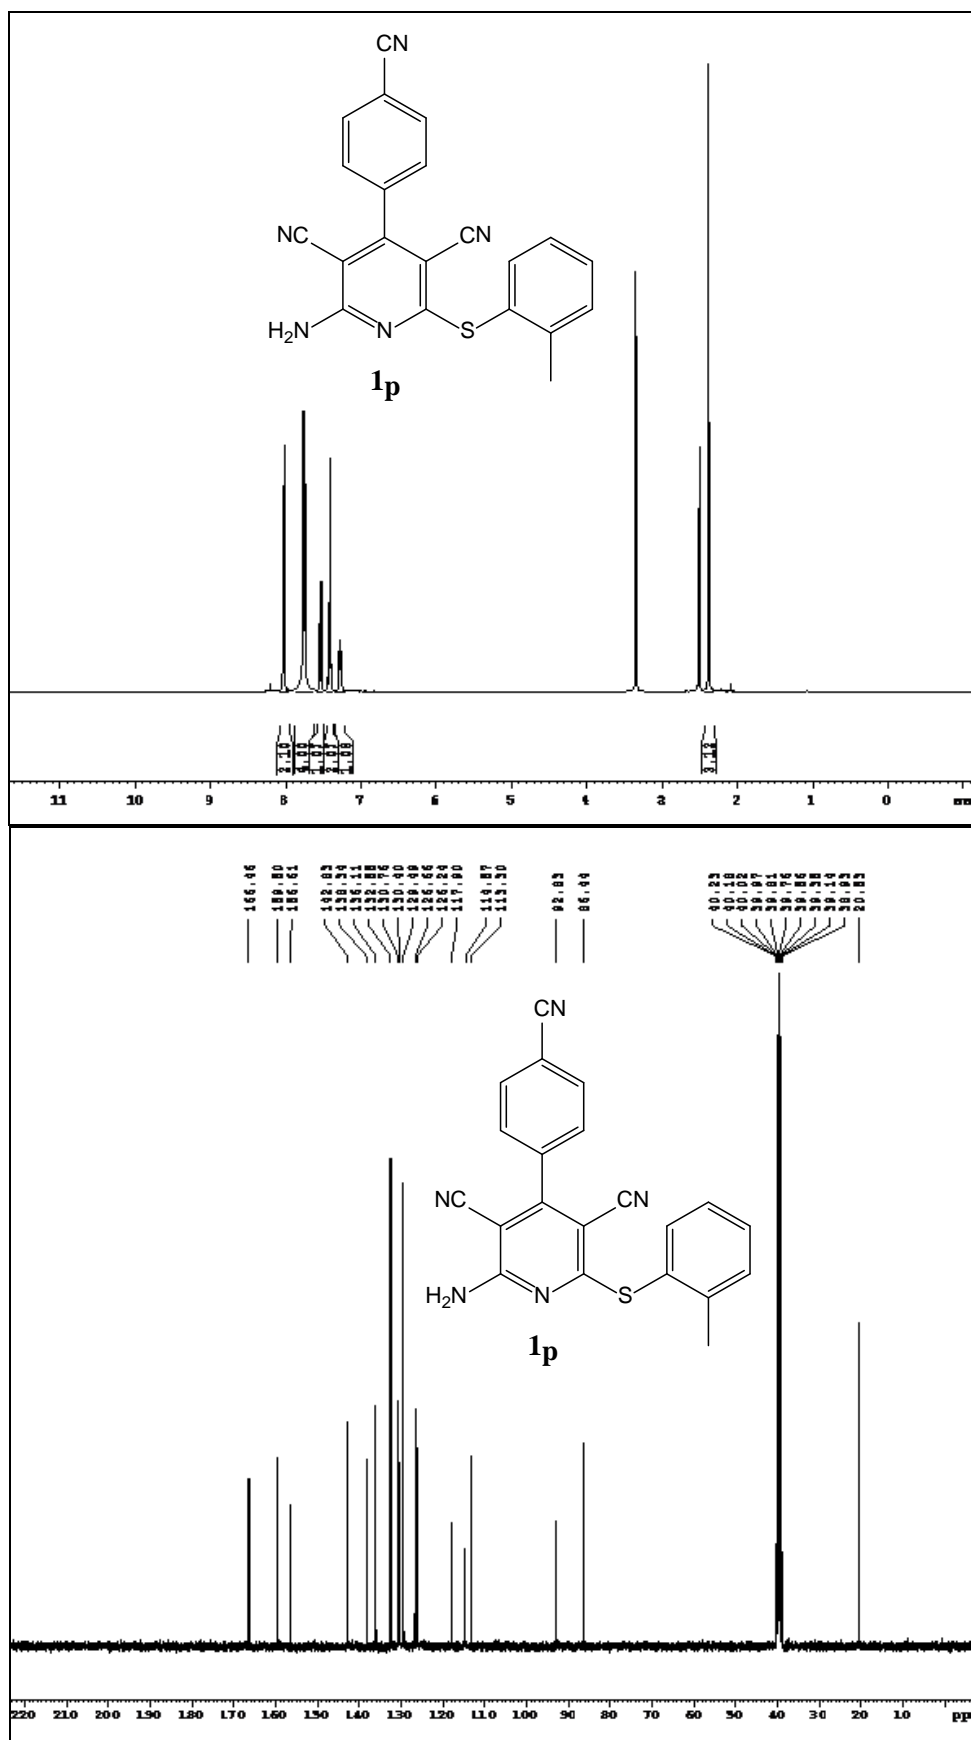

### $^1\text{H}$ and $^{13}\text{C}$ spectra of compound **2a**

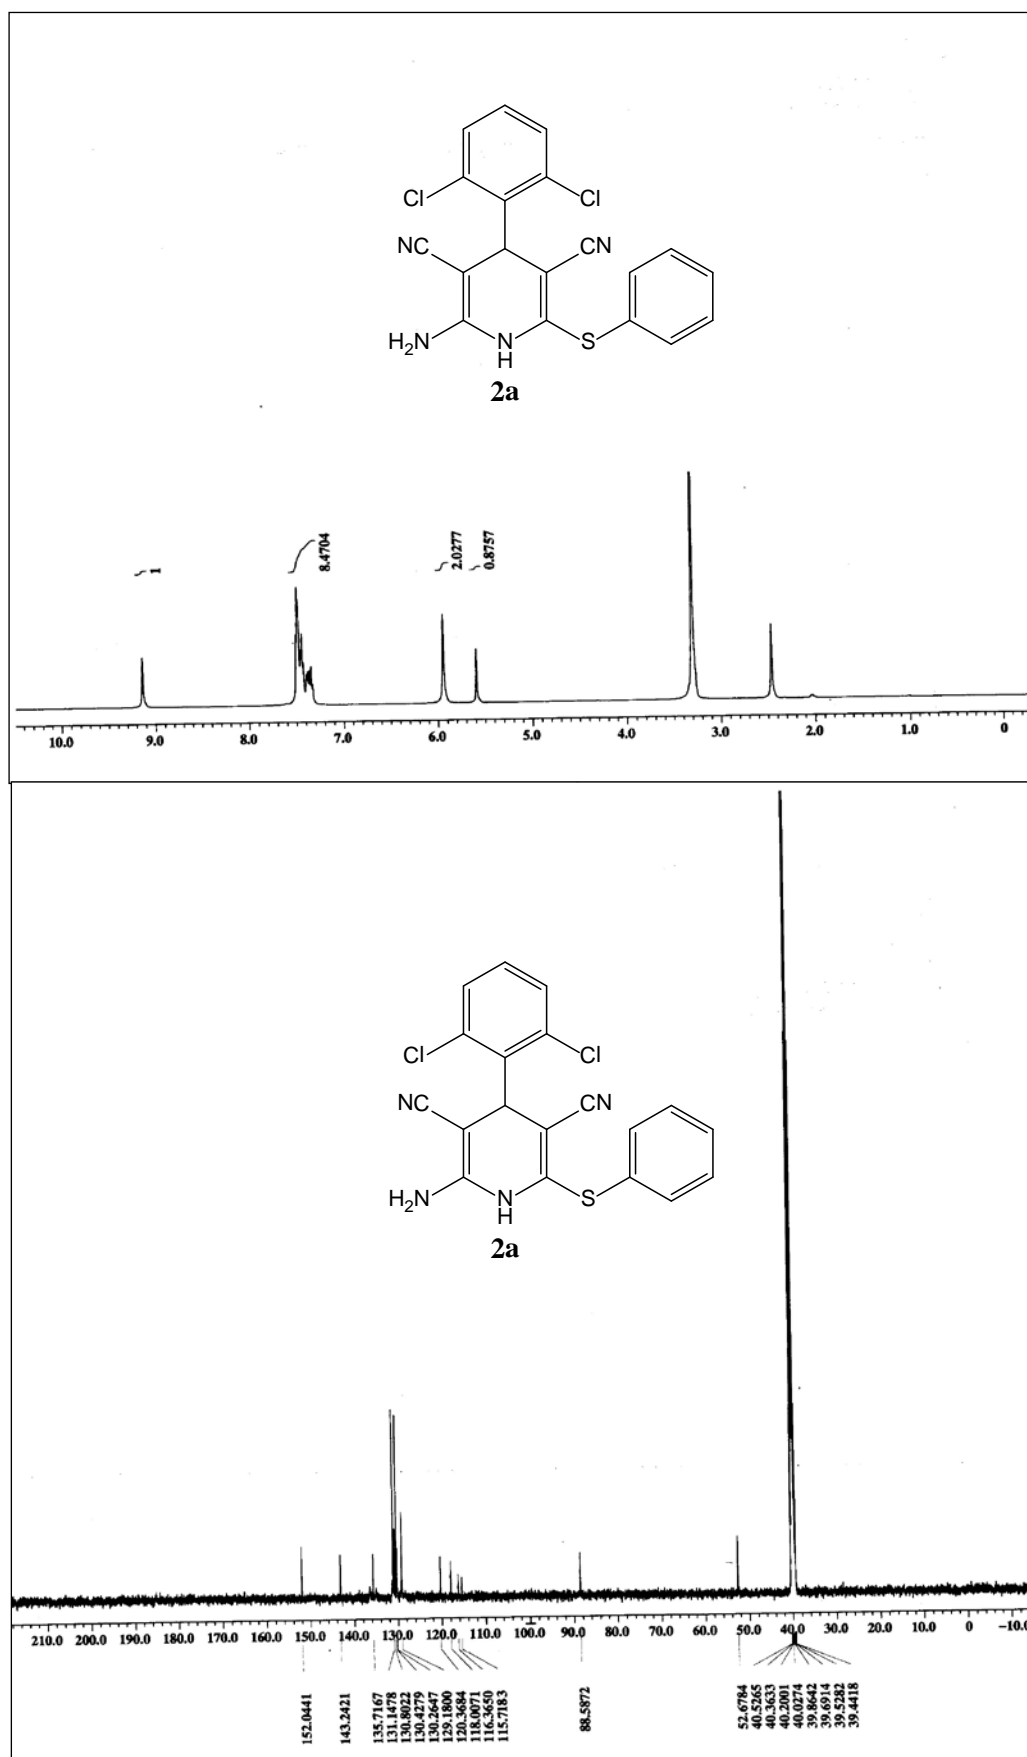

### $^1\text{H}$ and $^{13}\text{C}$ spectra of compound **2b**

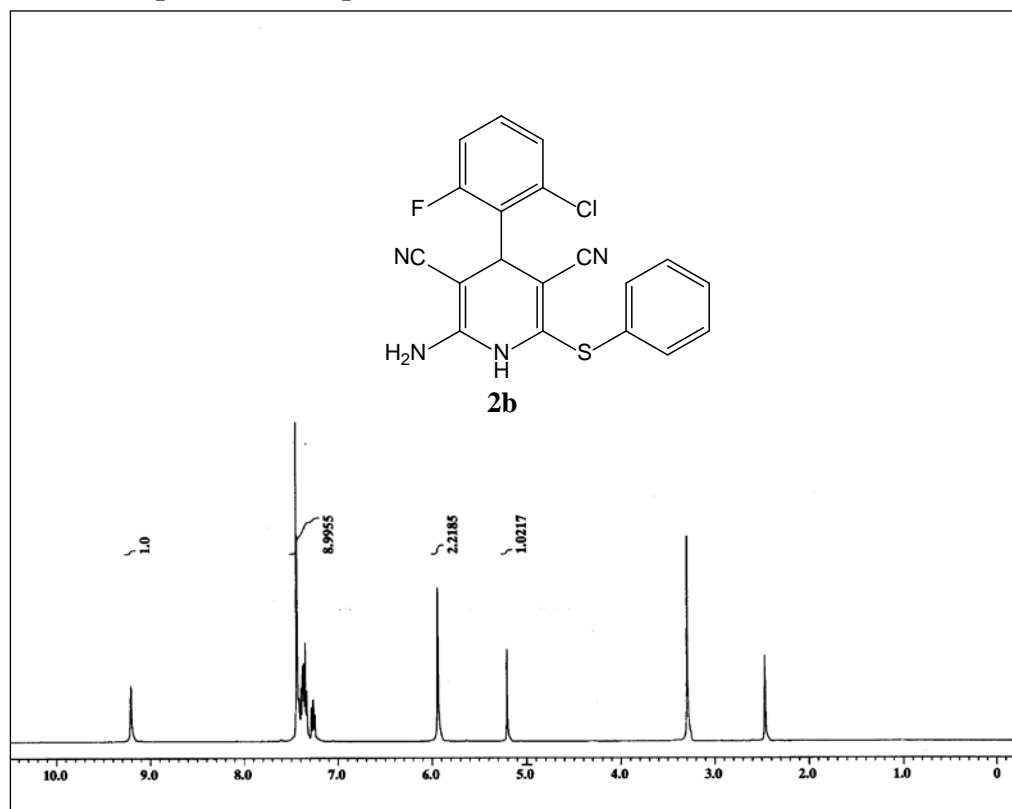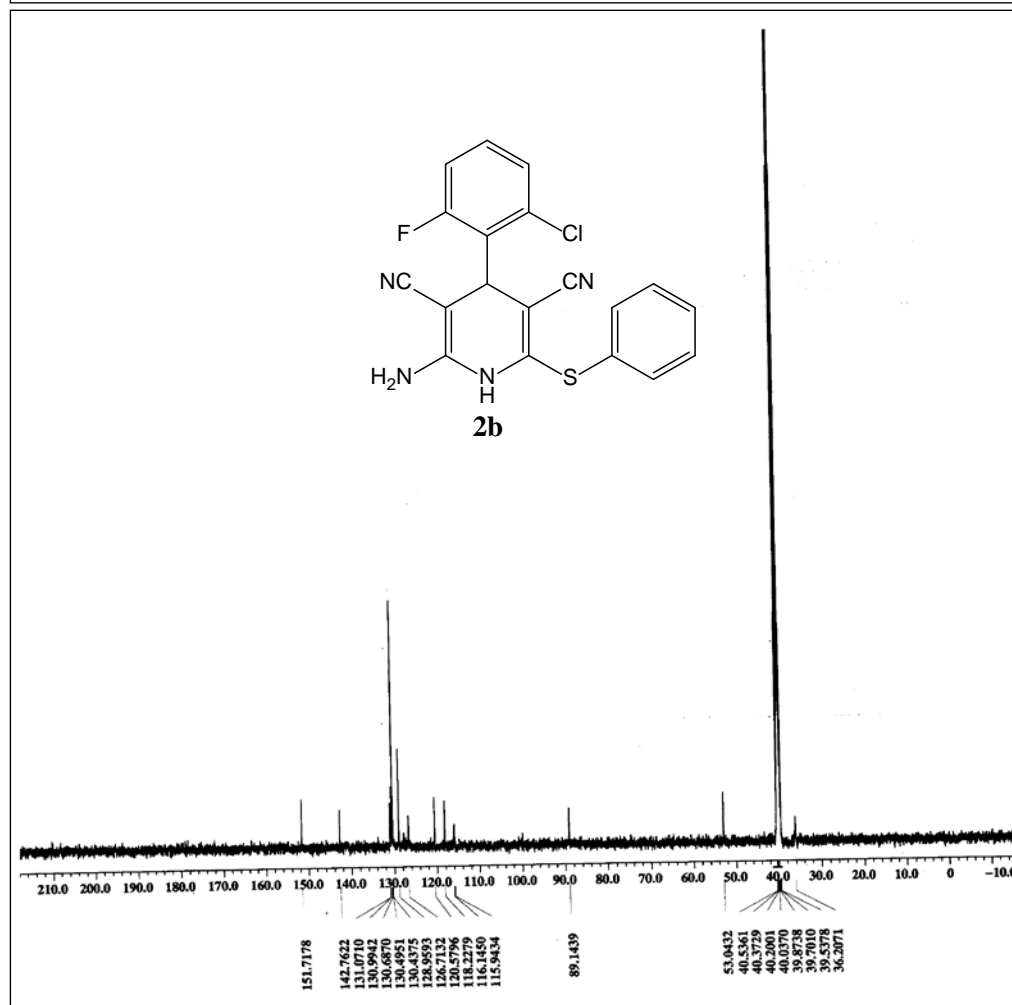

### $^1\text{H}$ and $^{13}\text{C}$ spectra of compound **2c**

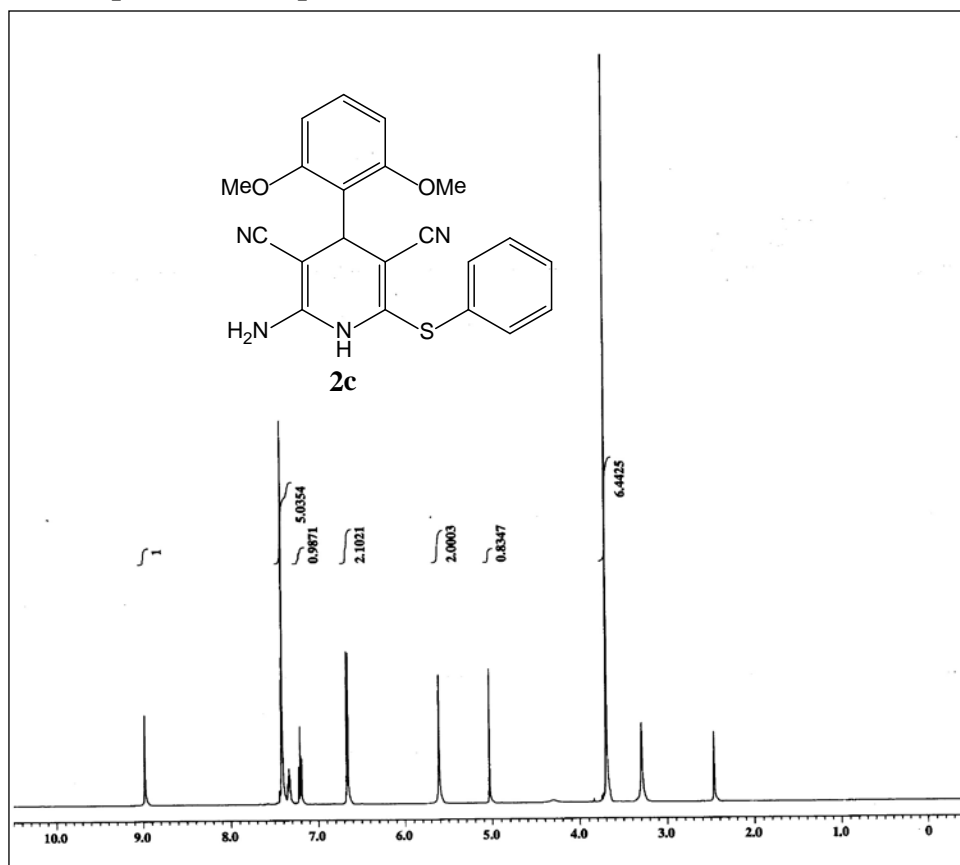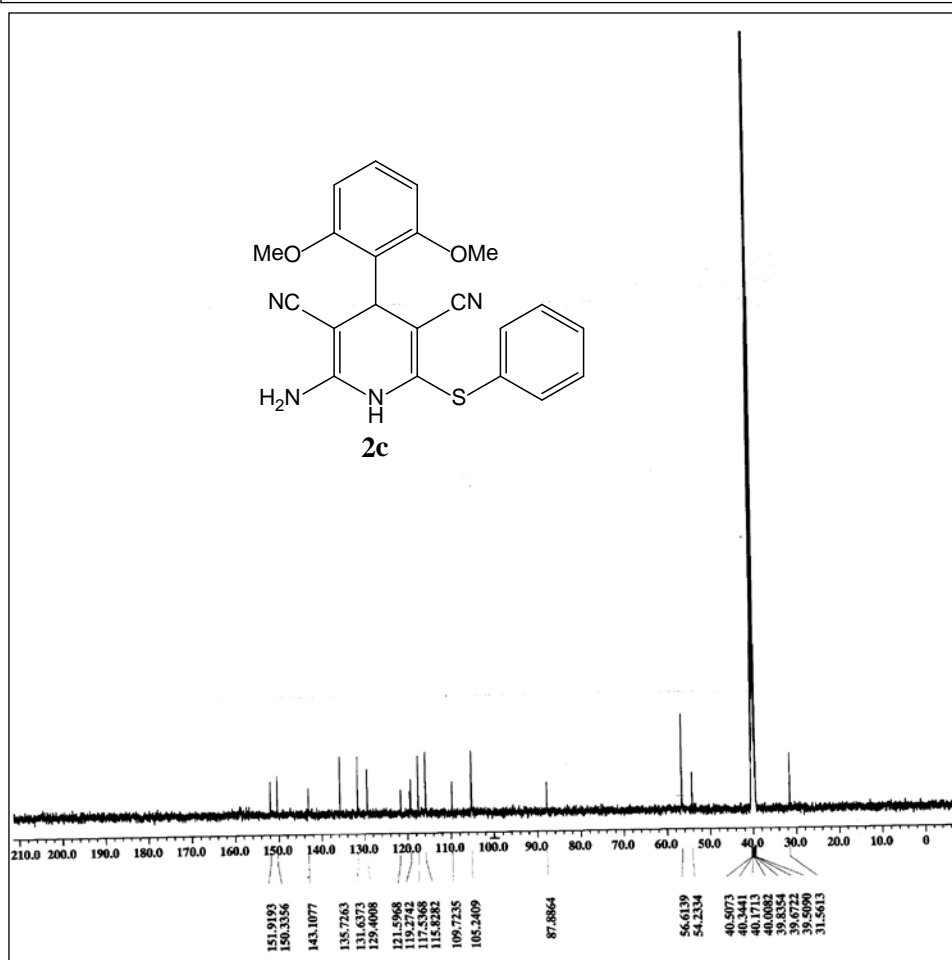

### $^1\text{H}$ and $^{13}\text{C}$ spectra of compound 5a

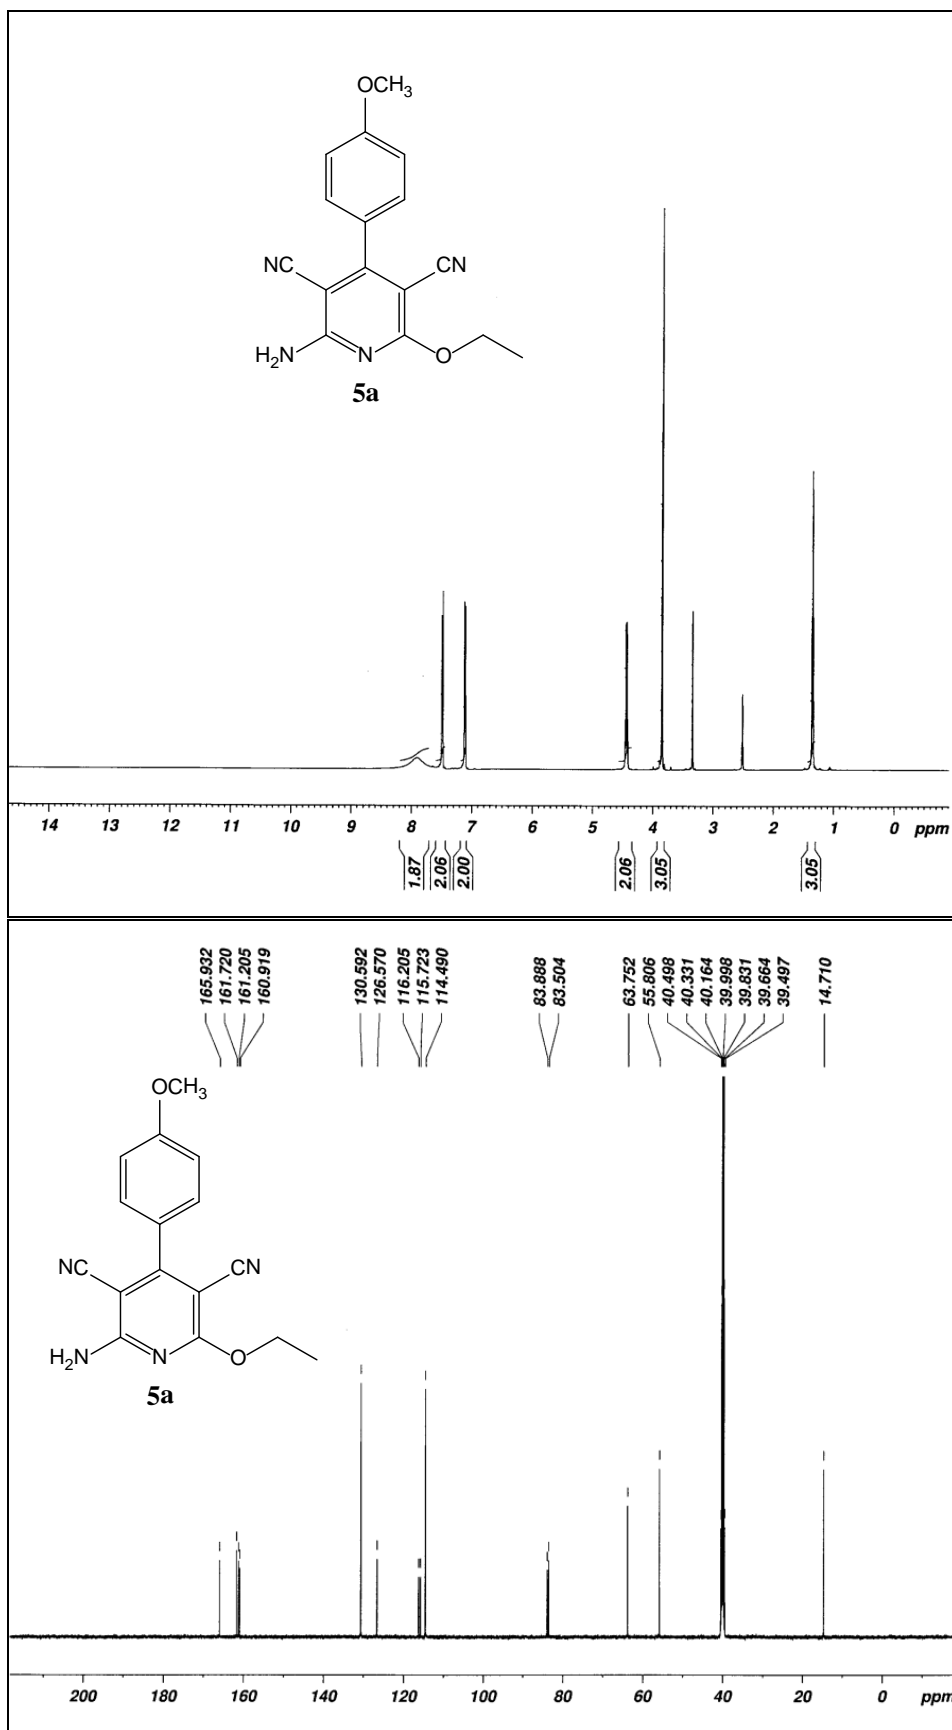

### $^1\text{H}$ and $^{13}\text{C}$ spectra of compound 5b

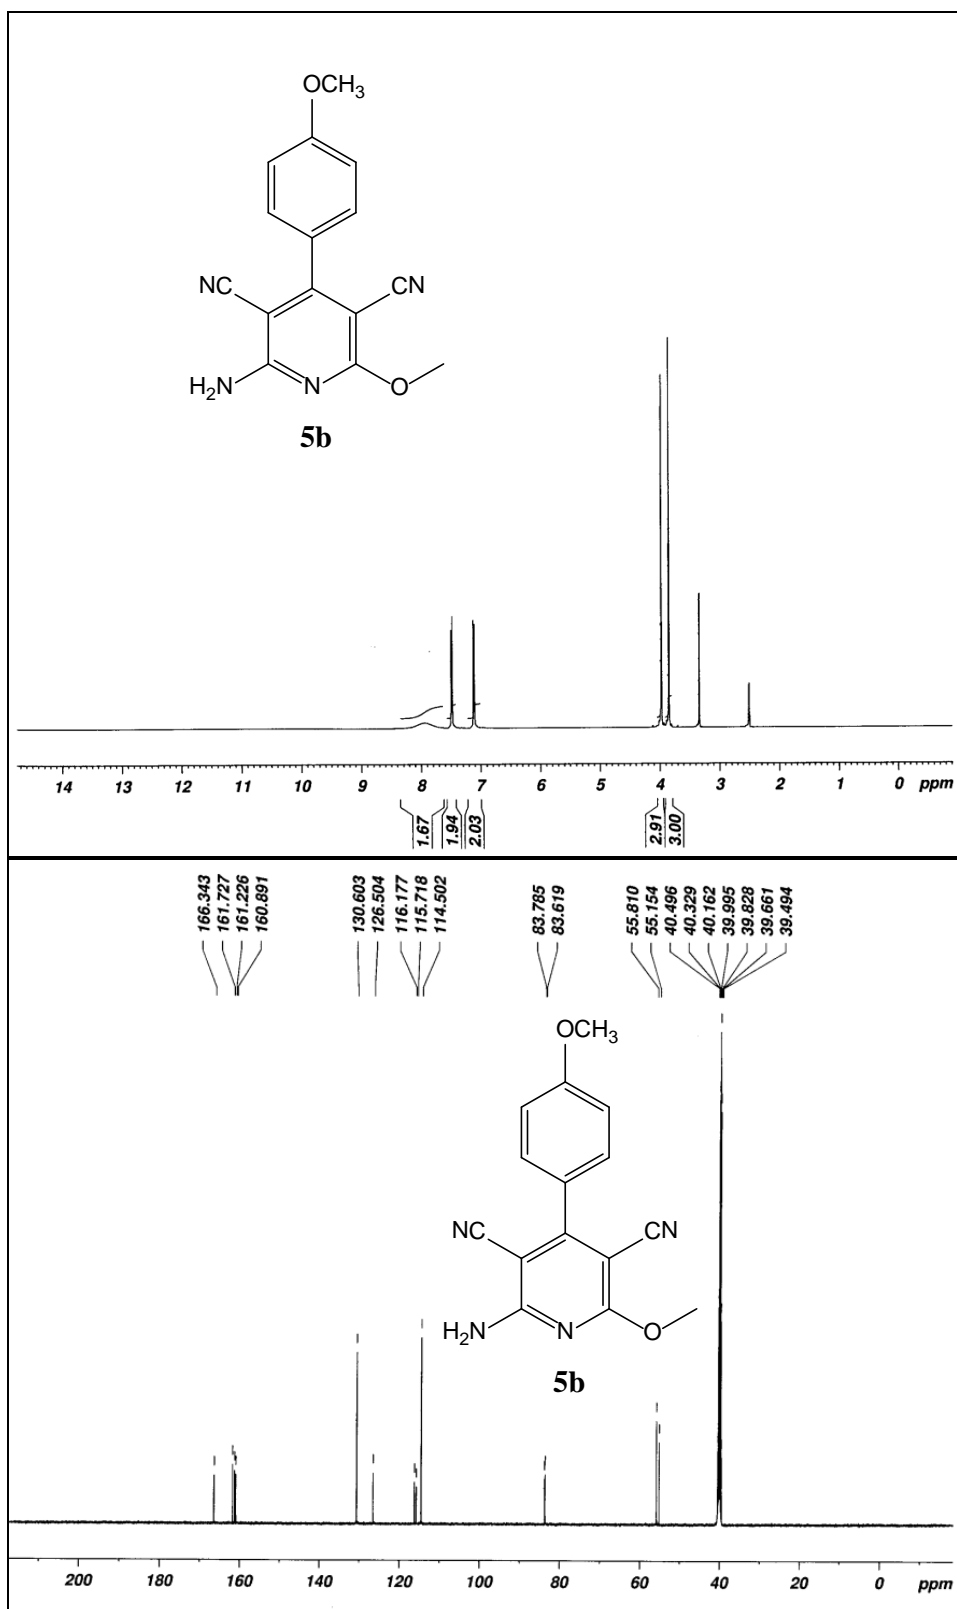

### $^1\text{H}$ and $^{13}\text{C}$ spectra of compound 5c

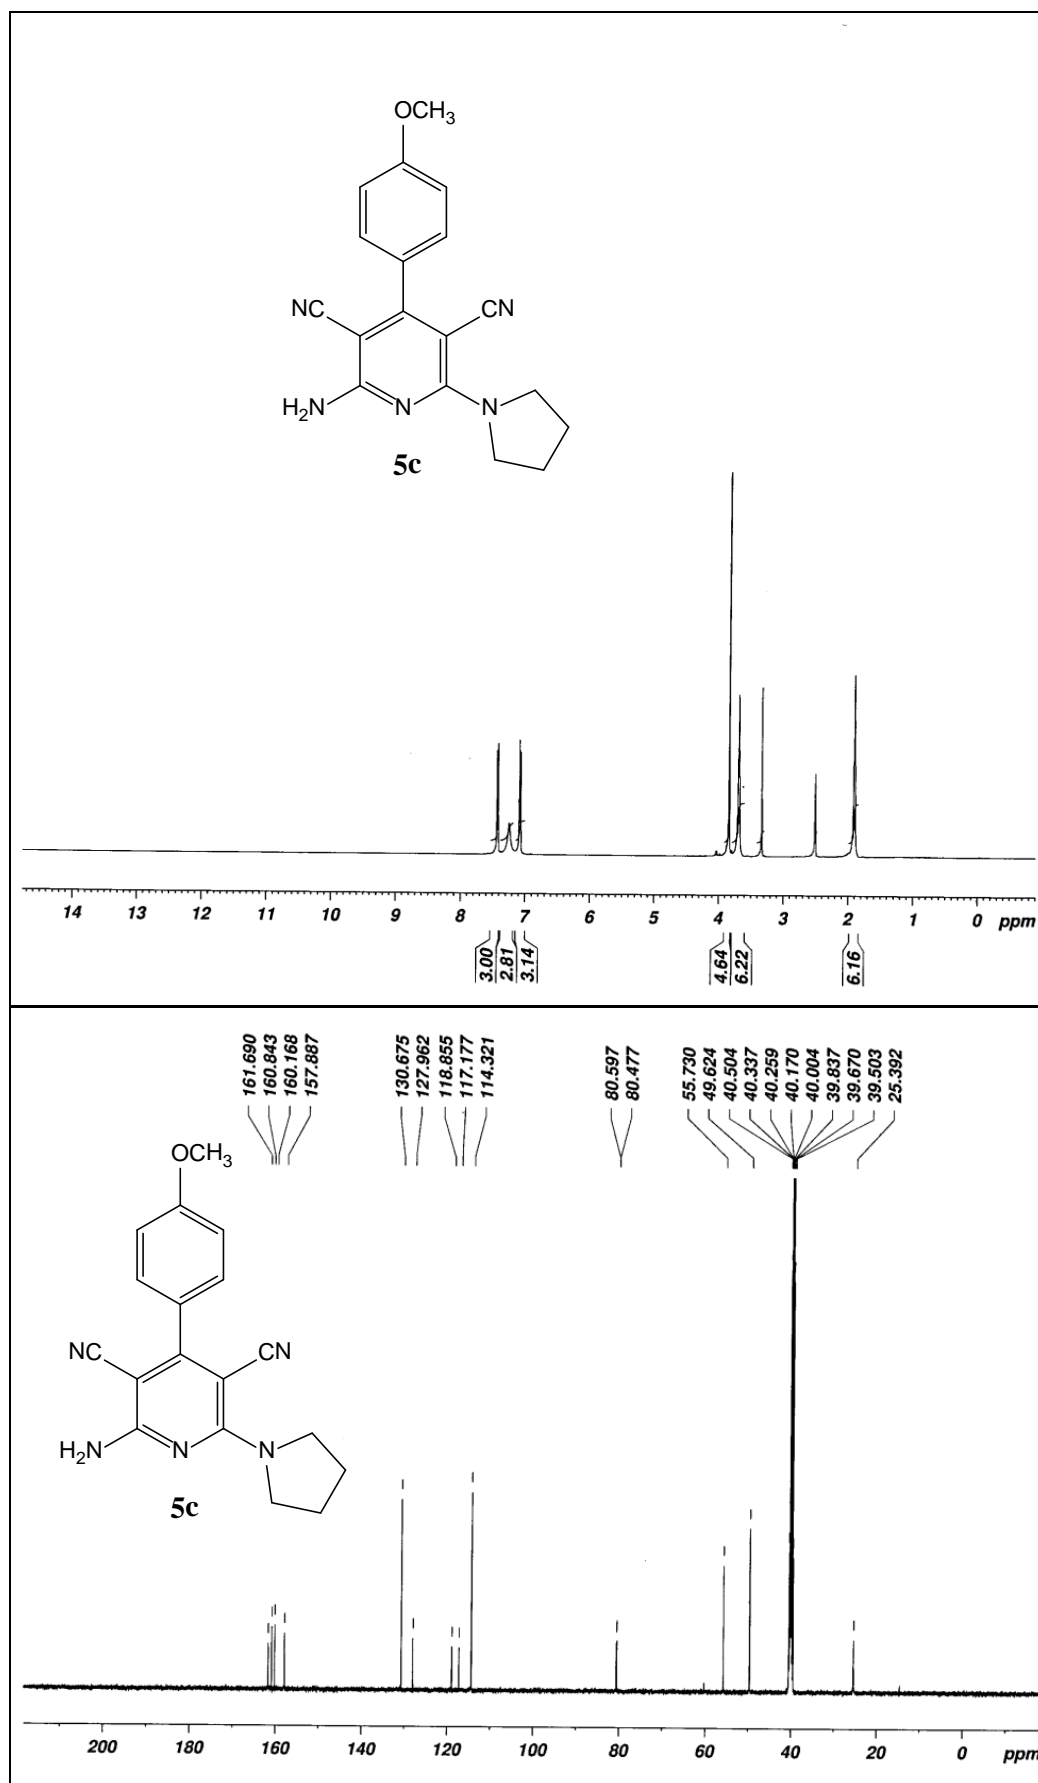



### $^1\text{H}$ and $^{13}\text{C}$ spectra of compound 5d

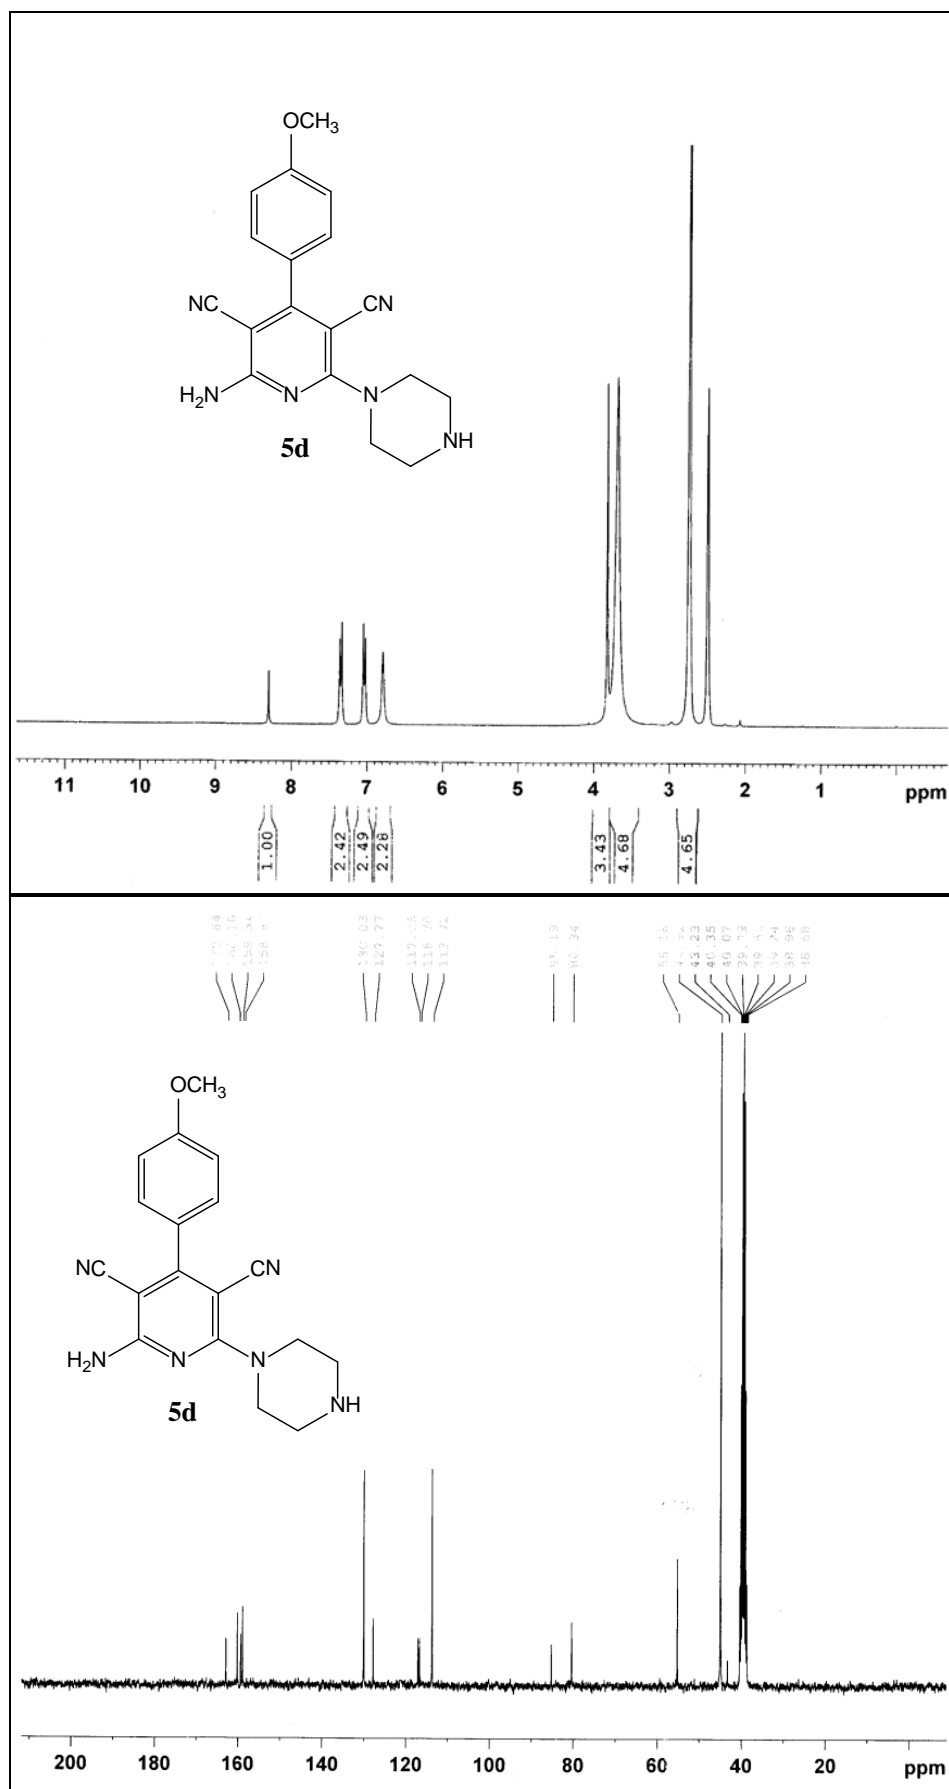

### $^1\text{H}$ and $^{13}\text{C}$ spectra of compound 3a

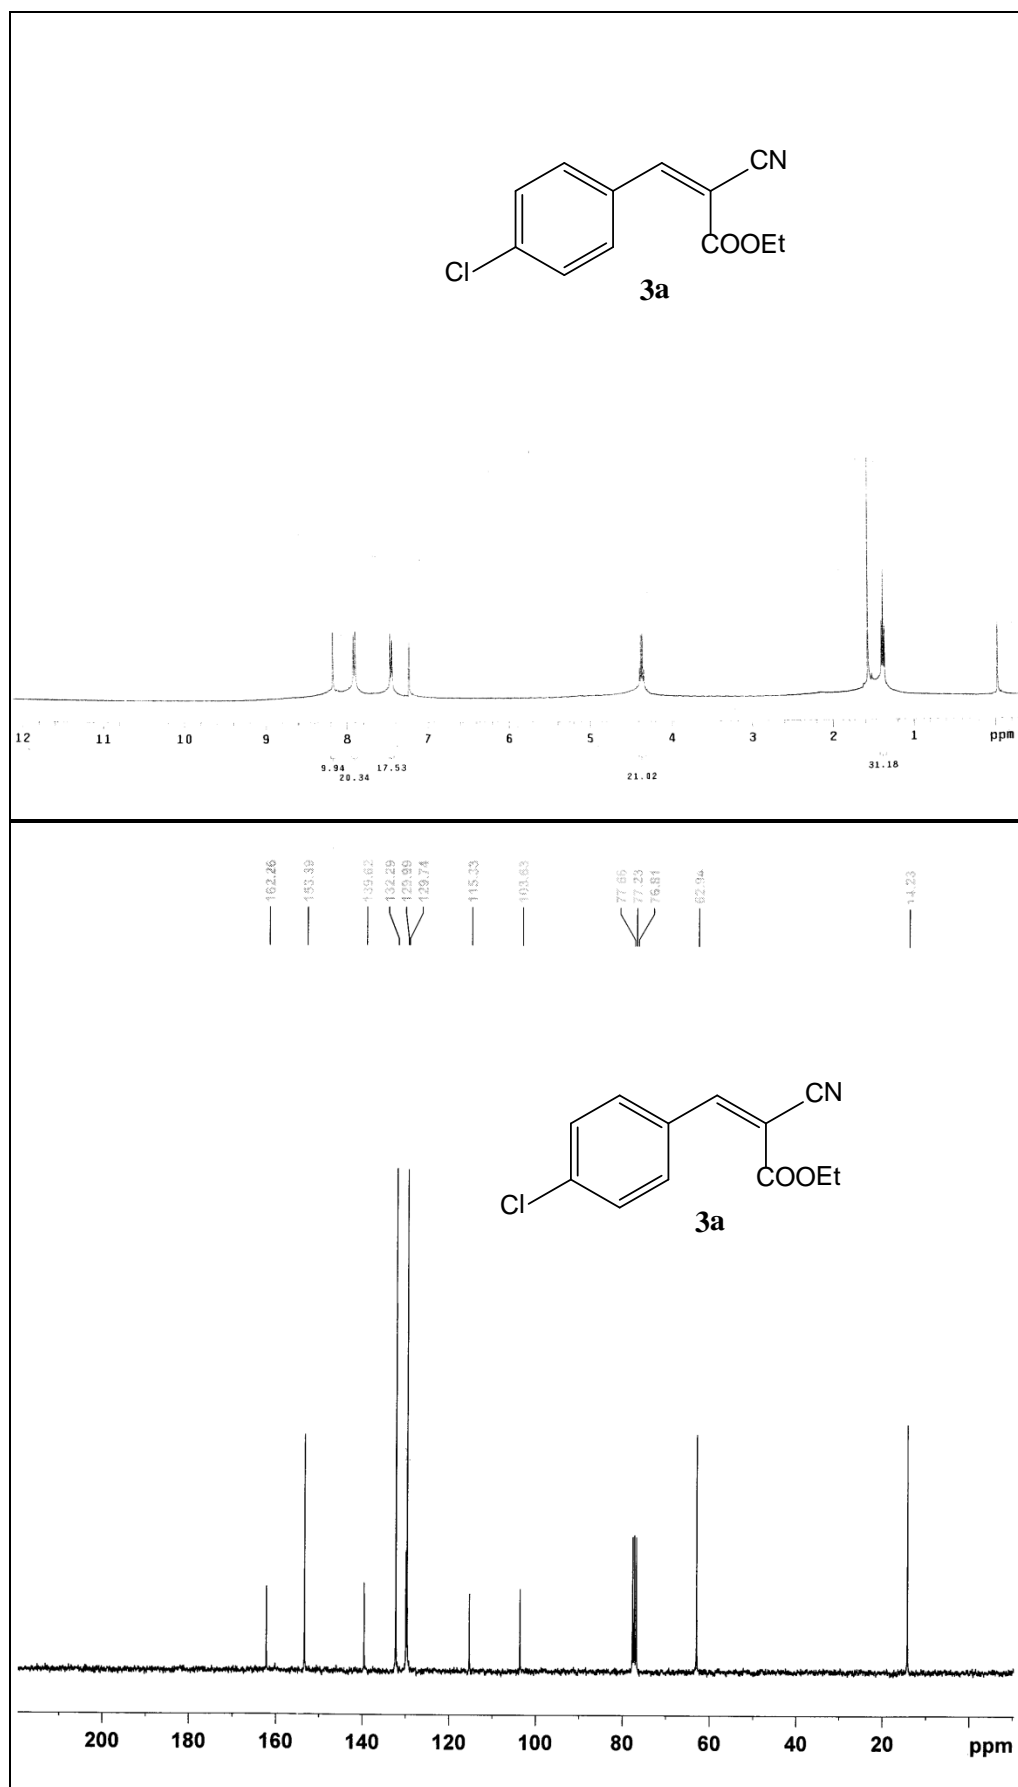

### $^1\text{H}$ and $^{13}\text{C}$ spectra of compound 3b

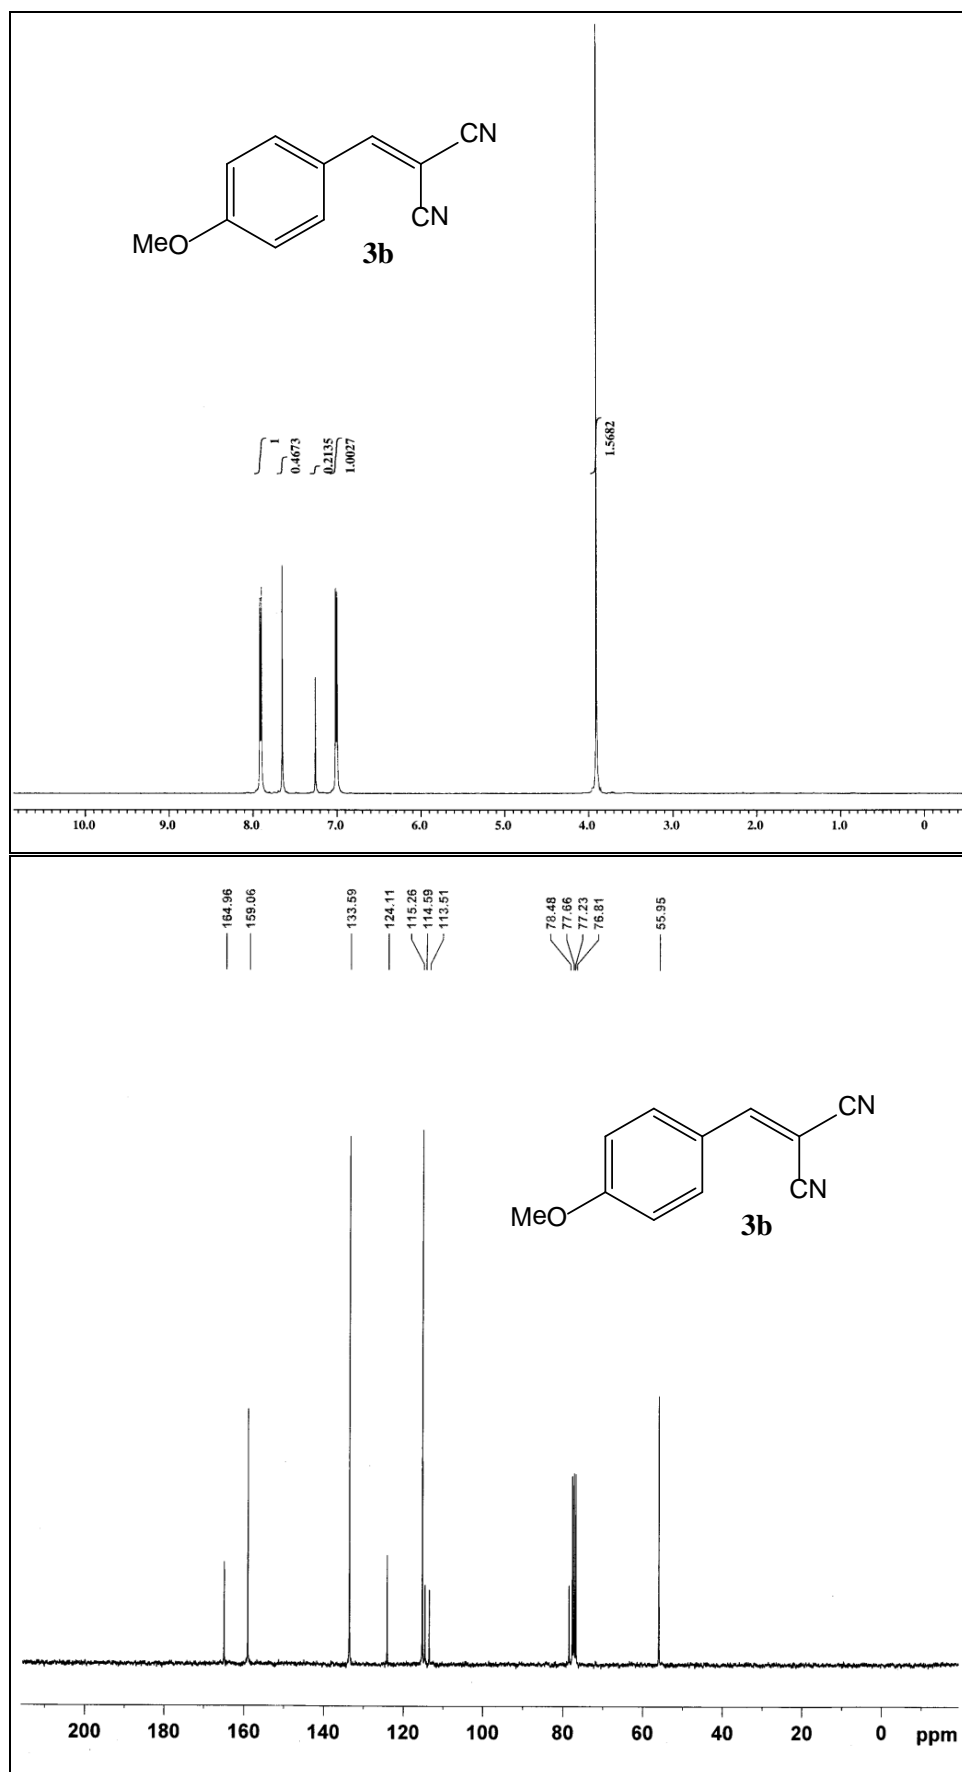

### $^1\text{H}$ and $^{13}\text{C}$ spectra of compound 4

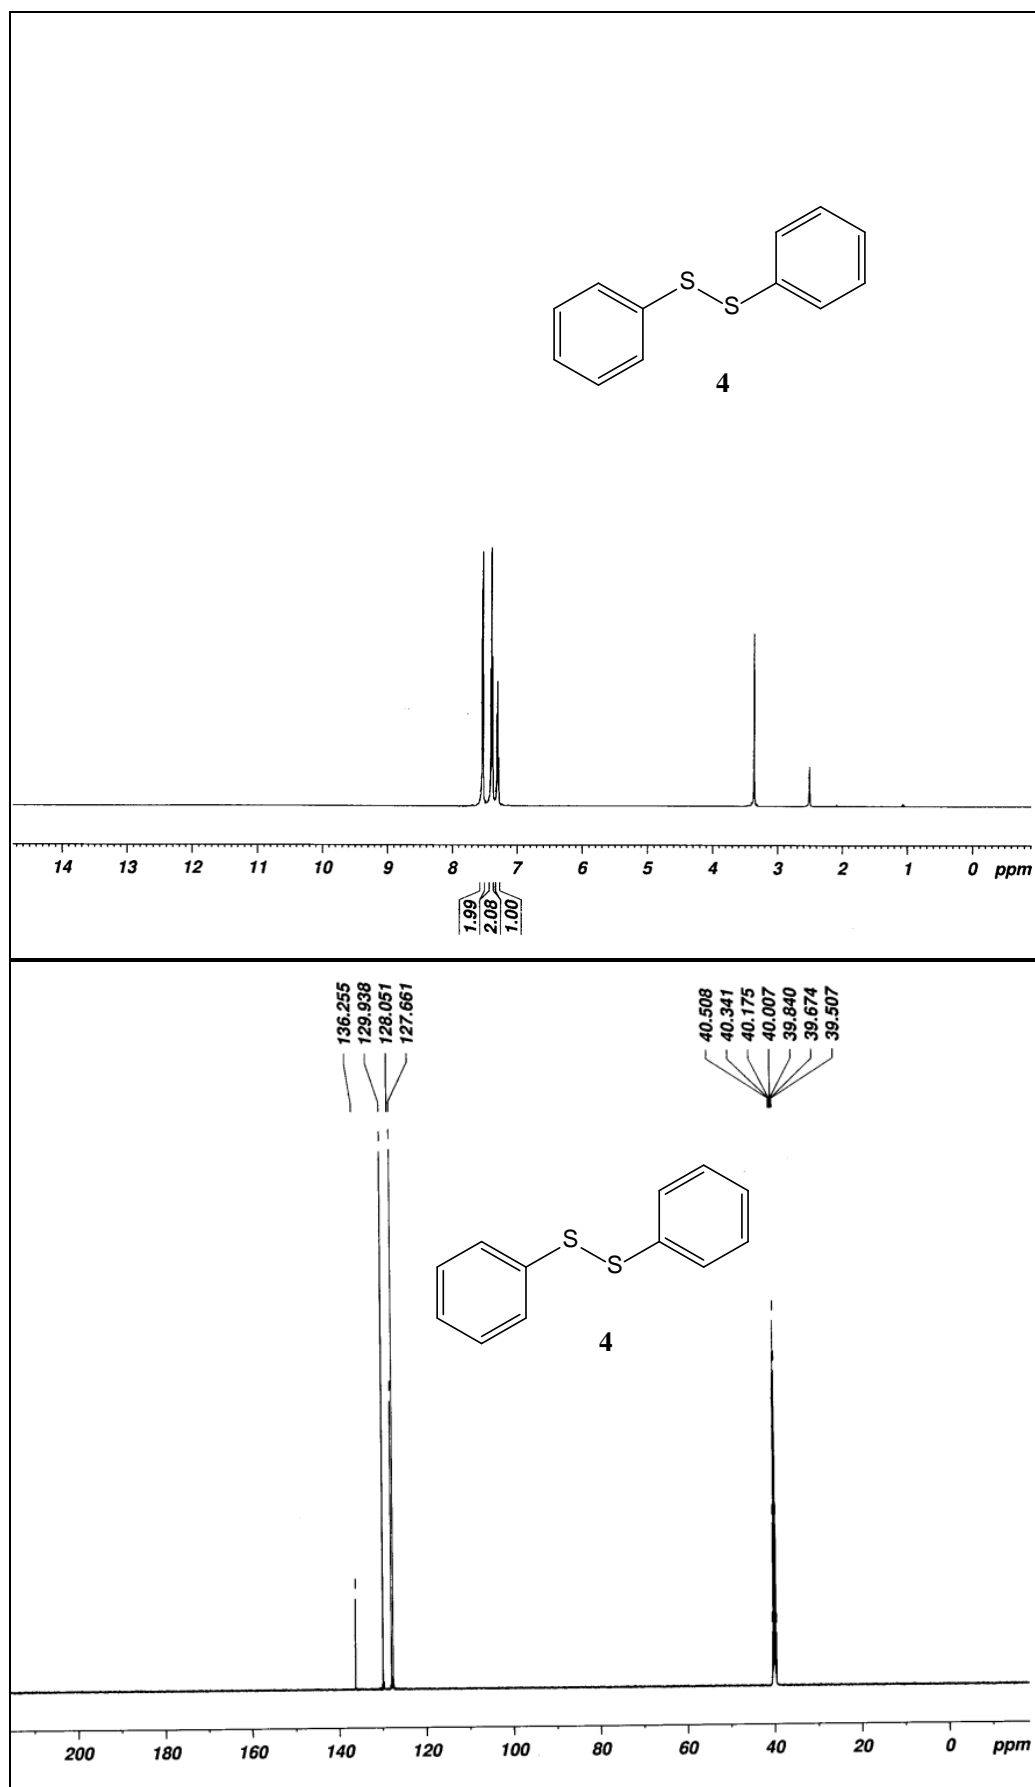

### $^1\text{H}$ and $^{13}\text{C}$ spectra of compound **6**

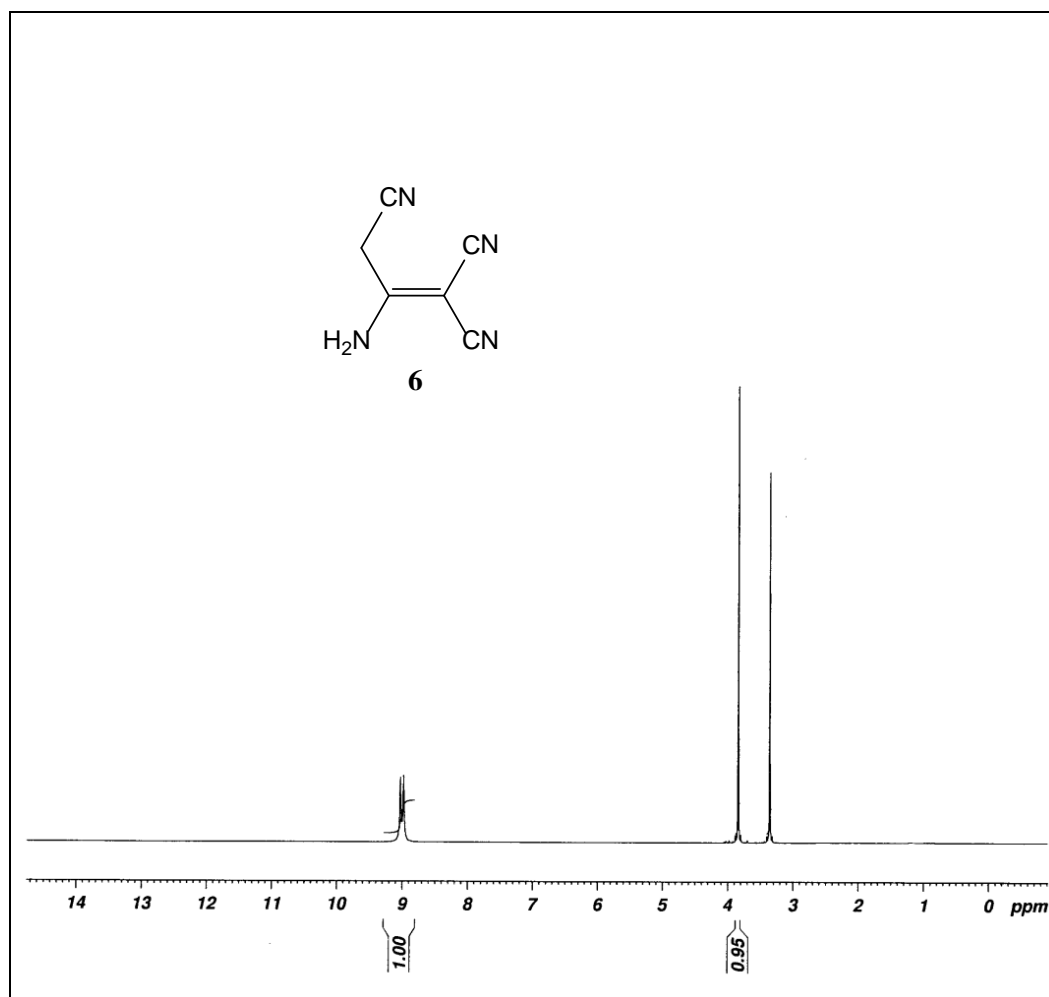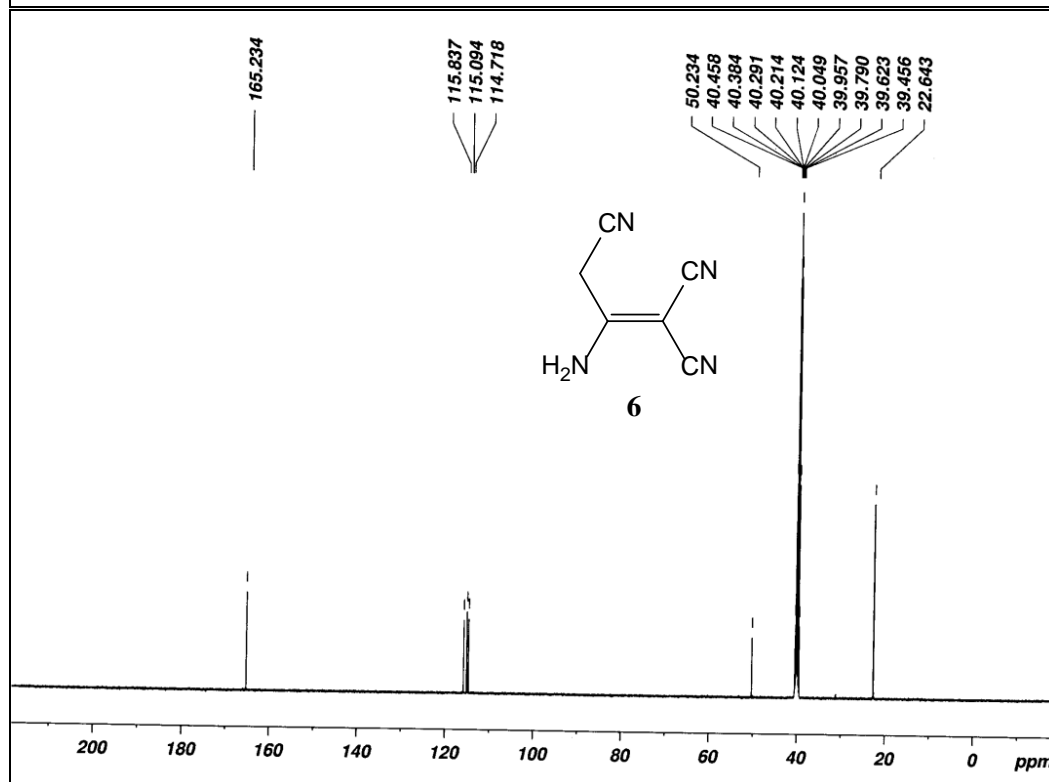

Supplement: c2ra21385k.pdf [file c2ra21385k.pdf]
